# Supplementary material for: Characterization of a carboxyl methyltransferase in Fusarium graminearum provides insights into the biosynthesis of fusarin A
Source: Royal Society of Chemistry journal article supplement (doi:10.1039/d1ob01010g), 2021-01-01
Supplement: d1ob01010g1.pdf [file d1ob01010g1.pdf]

## Supporting Information for

### Characterization of a Carboxyl Methyltransferase in *Fusarium graminearum* Provides Insights into the Biosynthesis of Fusarin A

Qian Yang,<sup>a,‡</sup> Wanqiu Wang,<sup>b,‡</sup> Yueting Lin,<sup>c</sup> Yuqi lin,<sup>a</sup> Zhijun Tang,<sup>a</sup> Jing Wang,<sup>a</sup> Jiang Tao,<sup>c,e\*</sup>  
Weihua Tang,<sup>b,\*</sup> Wen Liu<sup>a,d,\*</sup>

<sup>a</sup>State Key Laboratory of Bioorganic and Natural Products Chemistry, Center for Excellence on Molecular Synthesis, Shanghai Institute of Organic Chemistry, University of Chinese Academy of Sciences, 345 Lingling Road, Shanghai 200032, China.

<sup>b</sup>National Key Laboratory of Plant Molecular Genetics, CAS Center for Excellence in Molecular Plant Sciences, Institute of Plant Physiology and Ecology, Chinese Academy of Sciences, 300 Fenglin Road, Shanghai 200032, China.

<sup>c</sup>Department of General Dentistry, Ninth People's Hospital, Shanghai Jiao Tong University School of Medicine, 639 Zhizaoju Road, Shanghai 200011, China.

<sup>d</sup>Huzhou Center of Bio-Synthetic Innovation, 1366 Hongfeng Road, Huzhou 313000, China.

<sup>e</sup>Laboratory of oral Microbiota and Systemic Disease, Shanghai Ninth People's Hospital, College of Stomatology, Shanghai Jiaotong University School of Medicine, Shanghai, China

Corresponding author(s): Jiang Tao, E-mail: [taojiang\\_doctor@hotmail.com](mailto:taojiang_doctor@hotmail.com). Weihua Tang, E-mail: [whtang@cemps.ac.cn](mailto:whtang@cemps.ac.cn). Wen  
Liu, E-mail: [wliu@sioc.ac.cn](mailto:wliu@sioc.ac.cn)

‡ These authors equally contributed to this work.

## Contents

|                                                                                                          |           |
|----------------------------------------------------------------------------------------------------------|-----------|
| <b>1. Experimental Procedures</b> .....                                                                  | <b>3</b>  |
| 1.1 General experimental procedures .....                                                                | 3         |
| 1.2 Alignment biosynthetic gene clusters <i>fus</i> and <i>Fgfus</i> and their predicted functions. .... | 4         |
| 1.3 Generation and characterization of <i>Fgfus9</i> deletion mutant.....                                | 5         |
| 1.4 Strains and culture conditions .....                                                                 | 6         |
| 1.5 Protein expression and purification .....                                                            | 6         |
| 1.6 <i>In vitro</i> assay of FgFus9 activity. ....                                                       | 7         |
| 1.7 Wheat coleoptiles infection assay. ....                                                              | 7         |
| 1.8 Phylogenetic analysis of protein sequences. ....                                                     | 7         |
| 1.9 Bioassays for antibacterial activities and cytotoxic.....                                            | 14        |
| 1.10 Extraction and purification of compounds <b>1-2</b> .....                                           | 15        |
| <b>2. Supplementary Figures</b> .....                                                                    | <b>16</b> |
| 2.1 UV absorption of compounds <b>1-2</b> . ....                                                         | 16        |
| <b>Figure S4</b> The UV absorption of compounds <b>1-2</b> . ....                                        | 16        |
| 2.2 HRESIMS and NMR spectra of <b>1-2</b> . ....                                                         | 16        |
| 2.3 SDS-PAGE analysis for the purified protein Fgfus9. ....                                              | 31        |
| <b>3 Supplementary references</b> .....                                                                  | <b>31</b> |

## 1. Experimental Procedures

### 1.1 General experimental procedures

The NMR experiments were run on a Bruker Avance III 500,  $^1\text{H}$  (500 MHz) and  $^{13}\text{C}$  NMR (100 MHz),  $J$  in Hz,  $\delta$  in ppm. HRESIMS data were measured on an Agilent 6200 series Q-TOF LC-MS spectrometer with C18 column (4.5×50 mm, 2.7  $\mu\text{m}$ , Agilent). High performance liquid chromatography (HPLC) analysis was carried out on an Agilent 1260 HPLC system (Agilent Technologies Inc., USA) equipped with a DAD detector. Semi-preparative HPLC was performed on an Agilent 1200 system. HPLC electrospray ionization MS (HPLC-ESI-MS) was performed on a Thermo Fisher LTQ Fleet ESI-MS spectrometer (Thermo Fisher Scientific Inc., USA), and the data were analyzed using Thermo Xcalibur software. Column chromatography was performed with silica gel (200-300 mesh, Qingdao Marine Chemical, Inc., Qingdao, People's Republic of China). Fractions were monitored by TLC, and spots were visualized by heating silica gel plates sprayed with 10%  $\text{H}_2\text{SO}_4$  in EtOH. Biochemicals and media were purchased from Sinopharm Chemical Reagent Co., Ltd. (China), Oxoid Ltd. (U.K.) or Sigma-Aldrich Co. LLC. (USA) unless otherwise stated. Enzymes were purchased from Takara Biotechnology Co. Ltd. (China). Restriction endonucleases were purchased from Thermo Fisher Scientific Co. Ltd. (USA). Chemical reagents were purchased from standard commercial sources.

## 1.2 Alignment biosynthetic gene clusters *fus* and *Fgfus* and their predicted functions.

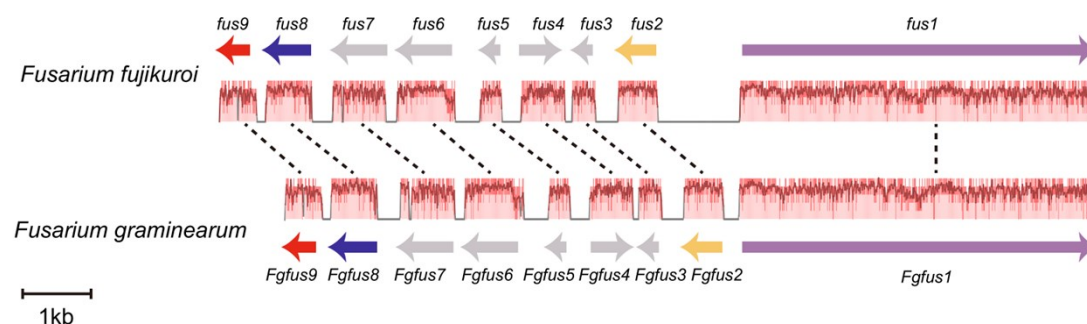

**Figure S1** Alignment biosynthetic gene clusters *fus* and *Fgfus*. Biosynthetic gene cluster of *fus* from *Fusarium fujikuroi* and *Fgfus* from *F. graminearum*.

**Table S1** The similarity of Fusarins biosynthetic genes between *Fusarium fujikuroi* and *F. graminearum* and the predicted functions.

| Gene Name in <i>Fusarium fujikuroi</i> | Gene Name in <i>Fusarium graminearum</i> | Similarity | Predicted Function                                                                                    |
|----------------------------------------|------------------------------------------|------------|-------------------------------------------------------------------------------------------------------|
| <i>fus1</i>                            | <i>Fgfus1</i>                            | 74.18%     | Polyketide synthase/nonribosomal peptide synthetase                                                   |
| <i>fus2</i>                            | <i>Fgfus2</i>                            | 87.35%     | Related to a putative $\alpha/\beta$ hydrolase, probably involved in the 2-pyrrolidone ring formation |
| <i>fus3</i>                            | <i>Fgfus3</i>                            | 73.18%     | Subunit of elongation factor 1B                                                                       |
| <i>fus4</i>                            | <i>Fgfus4</i>                            | 74.53%     | Peptidase                                                                                             |
| <i>fus5</i>                            | <i>Fgfus5</i>                            | 73.28%     | Glutathione S-transferase                                                                             |
| <i>fus6</i>                            | <i>Fgfus6</i>                            | 87.01%     | Transporter                                                                                           |
| <i>fus7</i>                            | <i>Fgfus7</i>                            | 70.59%     | Aldehyde dehydrogenase                                                                                |
| <i>fus8</i>                            | <i>Fgfus8</i>                            | 82.85%     | Cytochrome P450                                                                                       |
| <i>fus9</i>                            | <i>Fgfus9</i>                            | 67.58%     | Carboxyl methyltransferase                                                                            |

### 1.3 Generation and characterization of *Fgfus9* deletion mutant

To further investigate the biological function of the *Fgfus9* and its role in hyphae growth and pathogenesis, we generated three independent transgenic knockout strains ( $\Delta Fgfus9$ -1,  $\Delta Fgfus9$ -2,  $\Delta Fgfus9$ -3) using homologous recombination-mediated knockout technology to replace the *Fgfus9* with neomycin resistance gene. Furthermore, we amplified a cassette consisting of the promoter and gene and terminator region of the *Fgfus9* and ligated it into a vector containing the hygromycin resistance cassette. The vectors were linearized and transferred into the  $\Delta Fgfus9$  protoplasts and three independent transgenic complementary strains were obtained ( $\Delta Fgfus9C$ -1,  $\Delta Fgfus9C$ -2,  $\Delta Fgfus9C$ -3, **Figure S2**).

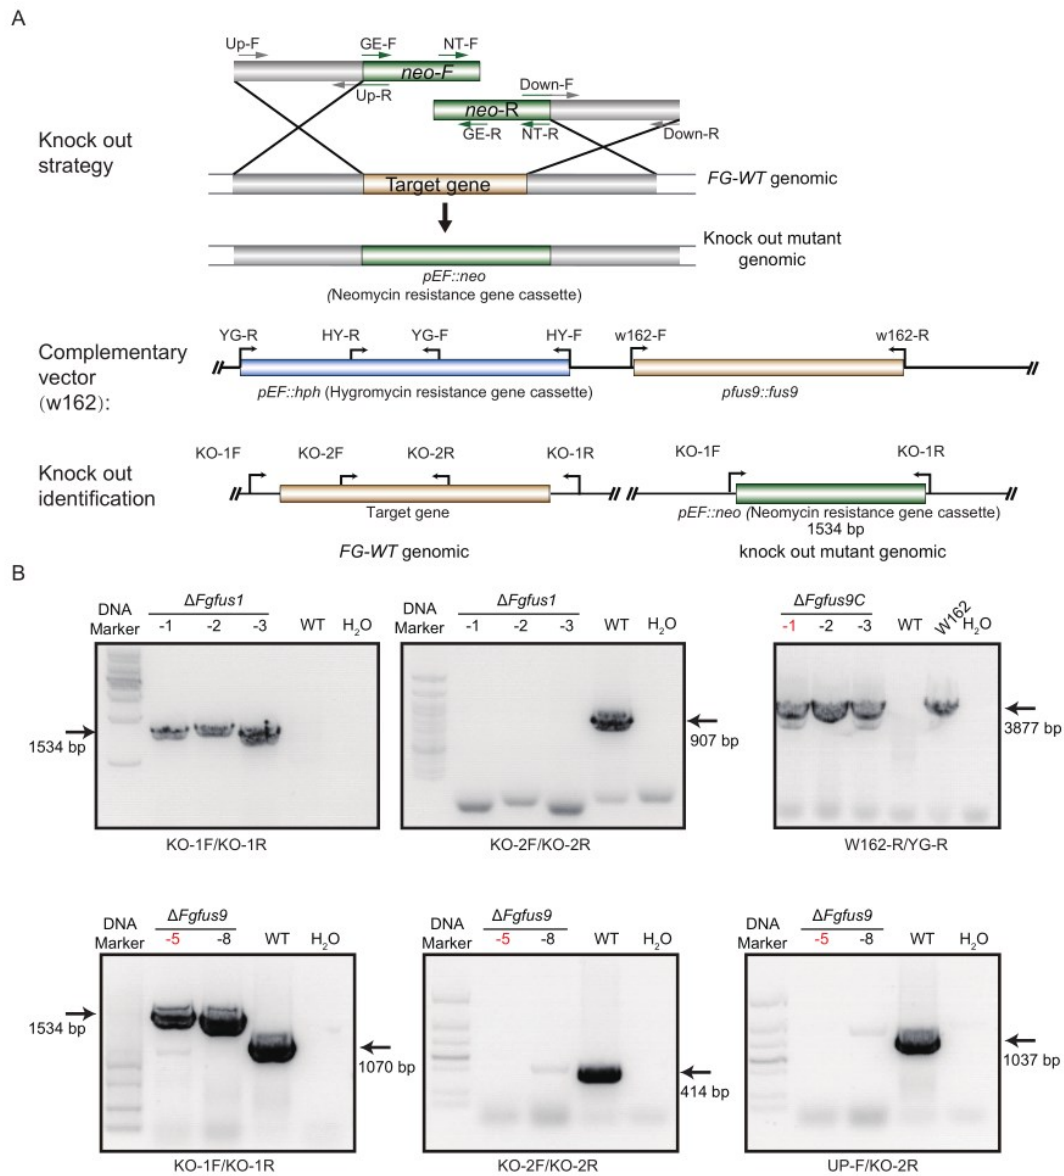

**Figure S2** Construction of *F. graminearum* gene deletion mutants. **A**, Diagram of gene knock out strategy via homologous recombination. **B**, Verification of *Fgfus1* and *Fgfus9* deletion mutants by genomic DNA PCR experiment. The corresponding positions of primers are indicated in panel A. *WT*: wild-type strain.  $\Delta Fgfus9C$ : *Fgfus9* complementary strain. The number marked with a dash represent independent transgenic lines of homologous recombination mutants. The line used for the construction of *Fgfus9* complementary strain are labeled with red.

## 1.4 Strains and culture conditions

The wild type strain *F. graminearum* PH-1 (NRRL 31084) was used as the parent strain for  $\Delta Fgfus9$  transgenic construction. The gene knock out construction was mainly performed by Split-marker homologous recombination approach<sup>1</sup> with the following modifications. Primer UP-F/UP-R and DOWN-F/DOWN-R were used for *Fgfus9* upstream and downstream amplification, then transformed PCR products into protoplasts of wild type and screened using TB3 plate containing gromycin. Verified the positive transformants using genomic DNA PCR with primers internal (Primer IF and IR) and external (Primer U and D). All fungal mutant strains and primer sequences used in this study are listed in Supplementary Table S3. For *Fgfus9* complementation assay, a 2.3-kb region containing the gene and the promoter and the terminator region was amplified using the primer pairs (Supplementary TableS3) and then cloned into a vector with the hygromycin resistant cassette. The correct construct was transformed into protoplasts of FG- $\Delta Fgfus9$ . All strains of the *F. graminearum* were incubated at 25°C in the dark. For the fungal growth assays, each construct with three independent lines were grown in a 9-cm Petri dish containing different medium. Photographed and measured the diameter of the fungal colony every day until reached the edge of the Petri dish.

## 1.5 Protein expression and purification

PCR amplifications were carried out on an Applied Biosystems Veriti™ Thermal Cycler using HS KOD DNA polymerase (Takara Biotechnology Co., Ltd. Japan) for high fidelity amplification. The synthesis of primers and genes were performed at Shanghai BioSune Biotech. The cDNA fragments containing target genes *Fgfus9* was amplified from genomic DNA of *F. graminearum*. While *Fgfus9* gene was cloned into pET28a(+) (linearized by NdeI and XhoI) for the expression of the recombinant Fgfus9 protein that is tagged by 6xHis at the C-terminus. The above derivatives of pET28a(+) and a pGro7 were introduced into *E. coli* BL-21(DE3). The culture of each resulting recombinant *E. coli* strain was incubated in Luria-Bertani (LB) medium (5 g of yeast extract, 10 g of tryptone and 10 g of NaCl per liter) containing 50 µg/mL kanamycin at 37°C and 220 rpm until the cell density reached 0.4-0.6 at OD600. Protein expression was induced by the addition of L-arabinose to a final concentration of 0.5 g/L. Then, the *E. coli* strain was incubated until the cell density reached 0.6-0.8 at OD600 and was cooled to 16 °C and induced with 0.1 mM isopropyl- $\beta$ -D-thiogalactopyranoside (IPTG), continued to cultivate at 16°C (220 rpm) for 20 hours. *E. coli* cells were re-suspended in lysis buffer (10% 20xPBS, 10% glycerol and 10 mM imidazole, pH 7.5). After disruption by FB-110X Low Temperature Ultra-Pressure Continuous Flow Cell Disrupter (Shanghai Litu Mechanical Equipment Engineering Co., Ltd, China), soluble fractions were collected by centrifugation. The protein that contains a 6xHis-tag was purified on a HisTrap HP column (GE Healthcare, USA), which was pre-treated with 10 column volumes (CVs) of lysis buffer followed by 10 CVs of wash buffer (10% 20xPBS, 10% glycerol and 40 mM imidazole, pH 7.5), using elution buffer (10% 20xPBS, 10% glycerol and 250 mM imidazole, pH 7.5). Desired protein fractions were concentrated (to 500 µM<sup>-1</sup> mM) using Amicon® Ultra-15 Centrifugal Filter Devices (MILLIPORE, USA) and desalted using a PD-10 Desalting Column (GE Healthcare, USA) according to the manufacturer's protocols, and then quantified in concentration by Bradford assay

using bovine serum albumin as the standard. Finally, the resulting Fgfus9 protein was concentrated and stored at -80 °C for *in vitro* assays.

### **1.6 *In vitro* assay of FgFus9 activity.**

The conversion was conducted at 30°C for 2 hr in 50 µL of the reaction mixture that contained 200 µM **2**, 30 µM FgFus9, 200 µM SAM, 50 µM Hepes (2-[4-(2-hydroxyethyl)piperazin-1-yl]ethanesulfonic acid), add dd H<sub>2</sub>O to 50 µL. Conversions were quenched as described above, and after centrifugation, reaction mixtures were subjected to HPLC-HR-MS and HR-MS/MS analyses. The HPLC was conducted on a reversed-phase Agilent ZORBAX column (300SB-C18, 4.6 mm × 100 mm, Agilent Technologies Inc., USA) by gradient elution of solvent A (ddH<sub>2</sub>O + 0.1% formic acid) and solvent B (acetonitrile + 0.1% formic acid) with a flow rate of 1 mL/min over a 40 min period as follows: *T* = 0 min, 20% B; *T* = 25 min, 80% B; *T* = 30 min, 100% B; *T* = 35 min, 100% B; *T* = 37 min, 20% B; *T* = 40 min, 20% B.

### **1.7 Wheat coleoptiles infection assay.**

For pathogenicity evaluation, wheat (*Triticum aestivum*) cultivars Zhongyuan 98–68 was used for coleoptile infection. The wheat coleoptiles infection was mainly performed according the assay we reported previously. Briefly, picked plump seeds and rinsed the wheat seeds under running water overnight. Transferred the imbibed wheat seeds into a plate and cultivated at 25°C. Cut off the top of the wheat seedlings and drop 2 µL spore suspension (concentration: 10<sup>6</sup> per mL) on the wound at the 3th day. Incubated the inoculated seedlings in growth chamber at 25 °C with 95% relative humidity. Lesion sizes were photographed and measured at 7 dpi.

### **1.8 Phylogenetic analysis of protein sequences.**

The processes of phylogenetic analysis of Fgfus9 and other well-documented methyltransferases was run on MEGA7,<sup>2</sup> and the results indicated that FgFus9 probably is a new carboxyl methyltransferase.

**Table S2** The protein sequences well documented methyltransferase for phylogenetic analysis.

| Category/Name                     | protein sequences                                                                                                                                                                                                                                                                                                         |
|-----------------------------------|---------------------------------------------------------------------------------------------------------------------------------------------------------------------------------------------------------------------------------------------------------------------------------------------------------------------------|
| <b><i>N</i>-methyltransferase</b> |                                                                                                                                                                                                                                                                                                                           |
| EryCVI                            | MYEGAFAELYDRFYRGRGKDYASEAAQVARLVRDRRPSASSLLDVACGT<br>GAHLRRFADVDDVTGLELSAAMIELARPQLDGIPVLQGDMRGFALDREF<br>DAVTCMFSSIGHMRDSAELERALASFAHHLAPGGVVVVEPWVFPEDFLD<br>GYVAGDVVRDGLTISRVSHSVSRAGDTTRMEIHWVADPVNGPRHQVE<br>HYEITLFFERQQYEKAFIAAGCSVEYLADGPSGRGLFIGVRR                                                              |
| RavNMT                            | MSTLSVSQPGTPPTPADVEQAYGAEHADVYDAIYRGRGRDYAAEADAFL<br>AVLRTRRPEITSLLDVACGTGAHLAALRGSVDHVEGVLESPWMHTLATR<br>QLPGVAVHQDDMRSFNLSRRFSAVTCLFSSVGYLKSVEDLRRTLRTFRAH<br>VAPGGVALVEPWVFPETFLDGYVGSSLVEVDGRTIARVSHTVRAGSTS<br>MTVEYTVAEPVNGVRRFSDLHVLSTFTREQYEDAFERAGFAVEFLKDGPS<br>GRGLFLGVAPETTDGGPR                              |
| Veg24                             | MPARILACMTDQMARAAVRTTRADVLLASAGERGVLCDFYSETAADIYQ<br>DIMGDGDKDGSPEAGEYATHIRPESGPVLELAAGTGRLTFPLDLGLEVT<br>ALELSTAMLGALQKRLAEAPVEIQDRCTVVHGDMSAFALDTRFGTVMISS<br>GSINVLDDADRPVYASVREHLAPGGRFLLGVAVSEAVGPDEVERRQELP<br>GRSGRRYVLHARRSPAEEIHEITIYPADDEADPFLVCTNVRLLKEDQVVR<br>ELEQAGFDVIARTPFASQGAEGVLLLEAVVRG               |
| Veg25                             | MSDQLAQDAVRTTRADVLLASAGERGILCDYYSETAAEIYRDIMDDEGE<br>DPAASSEAEVFASHIPAGSAPVLELAAGAGRLTFPLDLGLEVTALELSAK<br>MVATLRLRLAEAPAEVQARCTAVVGDMAFADFDEQFRAVIISPGTIAVLD<br>DAGRAGLYASVRKHLAPGGQFLVGVGQQNPSKAEPLERFQDLTGESGRK<br>YMLHHERWFPGDDEVDHITIYPADDEADPFLICTHRMRIPNMDRIVRECEA<br>AGFDVTVQPFAGKLPEDVLLKASLRGDS                 |
| MtfA                              | XGSSHHHHHSGGLVPRGSXSNQLERGPVRTPHADVLLASVGERGVLCD<br>FYDEGAADTYRDLIQDADGTSEAREFATRTGPVSGPVLELAAGXGRLTFP<br>FLDLGWEVTALELSTSVLAAFRKRLAEAPADVRDRCTLVQGDXSFAFD<br>KRFGTVVSSGSINELDEADRRGLYASVREHLEPGGKFLLSLAXSEAAESE<br>PLERKQELPGRSGRRYVLHVRHLPAAEQEITIHPADETTDPFVVCTHRRRL<br>LAPDQVVRELVRSGFDVIAQTPFASGGAGRKDXLVEAVXPATADAR |
| H074_31692                        | MTNVDLEVVLMTDQLERGPARTAHAGVVLASAGDRGVLCDFYDEAGSD<br>TYRDLIQDADGTLETREFAARVPQDPGPVLELAAGMGRLLTFPFLGWEW<br>TALELSATVVTAFRKRLAESPELRRERCTVVQGDMSAFALGRRFGAVVISS<br>GSINELGEADRKGLYAAVLEHLRPGGKFLLSLELTKPVEAEPVERSQELSG<br>RSGRRHVLHVKILPSEELQEITIYPADETADPFVVCTHRRRLFTVDRIAREL<br>GQAGFDVVAREPFASTGAGRDDMVLVEAIPREVTADAK     |
| Bn4651_P2188                      | MEADAGGTEEAHGFAALVRPESGAILELGAGTGRLTIPLLELGWEVTALE<br>LSTAMLTTLRTRLDAPADLRDRCTLVHADMTAFKLGFRFGTAILSPSTID<br>LLDDADRPGLYSSVREHLRPGGRFLLGMANPDASGRQEPLERTQEFTGRS<br>GRRYVLHAKVYPSEEIRDVTIHPADESADPFVICVNRFRVITPDQIARELEQ<br>AGFDVVARTPLPGVRNHELVEAQWGSVEDAH                                                                 |
| <b><i>C</i>-methyltransferase</b> |                                                                                                                                                                                                                                                                                                                           |



---

|         |                                                                                                                                                                                                                                                                                                                                                                                                                                                         |
|---------|---------------------------------------------------------------------------------------------------------------------------------------------------------------------------------------------------------------------------------------------------------------------------------------------------------------------------------------------------------------------------------------------------------------------------------------------------------|
| ChryCMT | MSDLPNCRICGGALREFLDLGEQPMGNAFVTPGRQDDEAGAFRFRLTVA<br>VCEVCTMVQLTDYVRHDMRFHAAYPYRSSQSSVMSAHFENLARRFLQDE<br>LNGTDPFIVELGSNDGIMLRTVAKAGVRHLGVEPCGDVAEVRANGVRV<br>VSEFFDEDLAARIRAADGTADVFAANTFSHIDFLDSILRGVKNLLAPGGV<br>FVFEDPYFGDIVQRASFDQIYDEHIFFTARSVQDMAARHGLELVDVELLP<br>VHGELRCTLAHTGARPVSPA VPRLLRQEEEQGLTETATLTRFADGVREL<br>GETLVTRLREL RDQGRVVGYGATAKSTLLNYCGIGPDLVSFVCDSTAE<br>KQGR LTPGTHIPVRSSEAFADPYPDYALLAWNHKDEILDKESAFREAGG<br>RWIHYVPDVHID |
| AviG1   | MSTTGHSVIDRCRICDNTELLPVLDLGPQALTGVFPRTRGEDVPYVPLEL<br>VRCSPGGCELVQLRHTADFLMYGEGYGRSSLNRS MADHLRGKVAAIT<br>GLVDLGPGLVVDIGSNDGTLAAYPADGPRLVGVDPAA TVFAASYPPG<br>VELIPDFFAYDLLGGRAKVVTSIAMFYDLPRPMEFMREVGRLLTDDGIW<br>VTEQSYLPAMLHACAYDVVCHEHLDYYGLRQIEWMAERTGLKVDAEL<br>TPVYGGSLSLV LARRGSSRQVNEPALARIRAGETDLPYAEFARTEESRDR<br>LLEFLTASRDKGLHTLGYGASTKGNVILQYCGLDETLPCIAEVNEDKFGC<br>YTPGTNIPIVSEEEARALEPDQFLVLPWIYRDAMVARERDFLASGGSLVFP<br>LPTLEV V      |
| Sam34   | MSNNSRCRVCGGTVREFFDFGRQPLSDAFAPPDADFTQEFFFRLATGVCE<br>GCTMVQLMEEVPRDRMFHEDYPYHSSGSSVMREHFELAKRFLATELTG<br>DDPFIVEIGCNDGIMLKAVAEAGVRHLGVEPSGGVAALAA TKGIQVRNFA<br>FEQGTAGEIVTEQGRADVIAANTLCHIPYMESILTGVTALLKPTGVFVFE<br>DPYLGDIVERTSFDQIYDEHFFLFS AQSVQAMASRFGLELVDVERLAVHG<br>GEVRYTLAPAGRRTPTPEVAALVAQERERGIADPATLEAFGARVLKIRDD<br>LVALLEKLRAEGRRVVAYGATAKSATVTNLCGIGPELVEFVCDSTPAKQG<br>RVTPGTHIPVRESAAFAQPPDYALLFAWNHAEI MAKEQEFDRGGKWI<br>LYVPDVRIV |
| VEG17   | MSTTTQCRICDGTVREFIDFGRQPLSDAFVVPDGTREEFFYHLATGICDTC<br>TMVQLMEEIPRDRMFHEEYPYLSGSAYMRTHFEELAKRFLATELTGEDA<br>FIVELGSNDGIMLKAVAEAGVRHLGVDPSPGVADLAAAKGIRVRKDFEEEA<br>TAADIRANERP ADVIYAANTLCHIPYMDSILKGVNALLGPNGVFVFDPYL<br>GDIVERTSFDQIYDEHFFFTARSVQEMARRHGLELVDVERIPVHGGEVRY<br>TLALAGARTPTNAVAELLAWEAERQLSEYATLERFAVKVKNKEDLIAL<br>LTKLRDEGKR VVGYGATAKATVNNFCGVTPDLVEFISDTPPAKQGLSP<br>GQHIPPVHPKKFADNYPDYALLFAWNHAEIMNAEQAFRDAGGKWILY<br>VPDVHVI     |
| KijD1   | GHMTGPTDATAPARCRVCGD TVDEFDLGRQPLSDRFLTPADTDGEFFYR<br>LAVGRCHACGMVQLTEE VPRHLMFHEEYPYHSSGSSVMREHFAKVAQRL<br>LATELTGADPFVVEIGCNDGIMLRVHEAGVRHLGFEPSAGVAEVARSRG<br>VRVRTEFFEKATATAVRESEGP ADVIYAANTMCHIPYLESV FQGADALLG<br>PDGVVVFEDPYLGDIVAKTSFDQIYDEHFYLF SAGSVAAMAERFGFELVD<br>VERLPVHGGEVRYTLARRGARTPTEAVGRLLAEEREQGLDDLATLR TFA<br>ANVHTVRDELVALLTRLRAEGHRVVGYGATAKSATVTNFCGIGPDLVSF<br>VCDTTPGKQHRLTPGKHLVPRPAEAFADPYPDYALLFAWNHAEI MAKE            |

---

---

QEFRQAGGRWILYVPEVRVL

TcaB9 GHMSHLADVSPPTACRVCGGGVQEFLDLGRQPLSDRFRKPDELDDDEFTYR  
LAVGRCDSCEMVQLTEEVPRDLMFHEVYPYHSSGSSVMREHFAMLARDF  
LATELTGPDPFIVEIGCNDGIMLRTIQEAGVRHLGFEPSSGVAAKAREKGIR  
VRTDFFEKATADDVRRTEGPANVIYAANTLCHIPYVQSVLEGVDALLAPD  
GVFVFEDEPYLGDIVAKTSFDQIYDQHFFLFSATSVQGMARCGFELVDVQ  
RLPVHGGEVRYTLARQGSRTPSAAVAQLLAAEREQELSDMATLRAFAGN  
VVKIRDEL TALLHRLRAEGRSVVGYGATAKSATVTNFCGIGPDLVHSVYD  
TTPDKQNR LTPGAHIPVPASAFSDPYPDYALLFAWNHAEIMAKEQEFH  
QAGGRWILYVPEVHIR

***O*-methyltransferase**

BmbA MKISLTGAAETLLAPLCARALDARSAHPLLGDHIAAELIDRIDYDFGRLGM  
GEATAVGVALRARYFDRRVRAFLQAHPECTVVHLGCGLDSRFERLAPGA  
GVRWFDLDQPDVIELRKRLYPARPGHETLAASVTEPDWPAQVPTDRPVL  
VVAEGLSMYLSAEEGPRMLRTLVARFPHGELLFDTYSRFAVRSTRSLSLFR  
RTGARLAWGVDDPRELEREIPGLRLIEADSAYATAAGVDVRHLPRRLRLR  
MRIDTLLSRLPVLRGIGHLSRFAFGGSG

BstB MKVPLTGAAATLLAPLYARALDASSPHMLADSTAPELVQKIEYDFGALG  
MRPSNAVGVALARFFDRRTREFLTAHPNSTVLHLGCGLDNVRDRVERG  
PGVRWFDVDQPEVIEVREQLFSRSDHRTIAASVTETDWLAEVPTDLPVL  
VIAEGLTMYLAADEGPRMLRALVEHFSEGEAVFDTYARYAVRSTRSMAL  
FRKTGARLAWGVDDPRELEREVPGLRLVKSVKAYHTADPADFRRLPFAL  
RTRMRVDAEVLARLPVLGRVGHLSRYAFG

BotOMT MKISLTGAAETLLAPLYARALDARSAHPLLGDHIAAELLDRIDYDFDRLG  
MGEASAVGVALRARYFDRRVRAFLDAHPESTVVHLGCGLDSRFERLAPG  
PGVRWFDLDQPDVIELRKQLYPARPGHETLATS VTEPDWPAQVPTDRPVL  
VVAEGLSMYLSADEGPRMLRTLVAHFPPQEGELLFDTYSRFAVRSTRSLALF  
RKTGARLAWGVNDPRELERGIPGLRLIETDSAYATAAGVDVSHLPRTLRR  
RMRIDTHILARLPVLRHIGHISRYAFGPPA

bsmH MMSRALENAVYGLISTPVLHTAVKHGVFASLIEDGPDTAEGLAGRLGTDQ  
DTLERMLLVLTSLGVVERAAGGEYSPAPDAVPFLDRRNSRYLGGFVEHLT  
LETQGRGLDITYLAEGKPDTEASPFDDVYRDADSLRAFMRAMWDL SFG  
MSQELAAAGMAGTKRLVDVGGATGPFVAALLTEPTLSATVFDMPAV  
GHLVGEDADARPVADRLDFVGGDFFADELPHGDCLAFGYILSDWDDDDTC  
VTLLEKAYRACEAPGRV LMDRLFDDDRSGPLATAAMNLVMHIEMAGRH  
RTAAEFVALLERAGFGGCEVRRGSGEKHLVIGHKK

HrbU MHPGPIMGLMAGYWQVRMLLALEHDIFTELSKGPATSGEVADRMGLV  
ELGTHDLLTGLGHLGLLQVADGRFANSPLADRFLVRGGPEFLGGYLRFCF  
QELNPAWDGLATSLRTGRPTNRAAVVGNPYDTLYSDPDATDGFLDSMDL  
LSTPIGLAISRYDWSQYSSFIDVGGARGNFAHQVVTENPHLTAGVFDLPPL  
EGTFKRHIERLGATASGISFHGGDFFKDKLPKADVIVLGHV LHNWGVEDR  
VQLLKNVYDAVRPGGAVFVYDPMAGGEQPSLHAVLAGLAMLVWSRGG  
HEYSVEELHGWLREAGFWPETAEVPLHEDVLVIGHKDA

**Carboxyl-methyltransferase**

---

---

|        |                                                                                                                                                                                                                                                                                                                                                                                                                                                                                                                                                                                                                                                                                                                                                                       |
|--------|-----------------------------------------------------------------------------------------------------------------------------------------------------------------------------------------------------------------------------------------------------------------------------------------------------------------------------------------------------------------------------------------------------------------------------------------------------------------------------------------------------------------------------------------------------------------------------------------------------------------------------------------------------------------------------------------------------------------------------------------------------------------------|
| FgFus9 | MIKALPLFQKAAKVADHDGDHTAIIIEYGSAHGNNLEPIQAILKATPSRQ<br>VELLFSDRPENDFSTLSTTITSWADTLDKTEFPHALFLSMIPRNFYQKVVPL<br>KSAHLGFSLAALHHLHDHIPPTGVQSEDDQLLKKQAHLDLSTFLELRAQEI<br>ISGGSLVLSFVGQASAGYENYSGPVDACRNAMIEMVQQGIIPVSVAAAFR<br>VPTYNRTLDDVRKILGEMSNLWNVHDLFENDITHPAIHDLKKKQVEGED<br>ASQEYANVVIDWMMMAVCSGYFLKALKVGNNGGRYSDEEEERLLGDWVA<br>KTKALFIRDHKDEEVVCSFLYLHLGRV                                                                                                                                                                                                                                                                                                                                                                                                      |
| LCM    | MKNLTTIKQTNKNVKQERRKKYADLAIQGTNNSIASKRSVELLYLPKLS<br>SANNFQMDKNNKLLLEYFKFFVPPKIKRSPCINRGYWLRLF AIRSRLNSIIEQ<br>TPQDKKIVVVNLGCGYDPLPFQLLDTNNIQSQQYHDRVSFIDIDYSDLLKI<br>KIELIKTIPELSKIIGLSEDKDYVDDSNVDFLTPKYLARPCDLNDSKMFST<br>LLNECQLYDPNVVKVFVAEVSLAYMKPERSDSIIEATSKMENSHEIIEQLI<br>PKGPFEPFSKQMLAHFKRNSPLQSVLKYNTIESQVQRFNKLGFAVNVNG<br>DMFQLWESADEATKCELLKVEPFDELEEFHLFCHHYVLCHATNYKEFAF<br>TQGFLFDRSISEINLTVDEDYQLECECPINRKFGDVDVAGNDVFYMGGS<br>NPYRVNEILQLSIHYDKIDMKNIEVSSSEVPVARMCHTFTTISRNNQLLLIG<br>GRKAPHQGLSDNWIFDMKTREWSMIKLSHTR<br>FRHSACSLPDGNVLILGGVTEGPAMLLYNVTEEIFKDVTPKDEFFQNSLVS<br>AGLEFDPVSKQGILGGGFMDQTTVSDKAIFKYDAENATEPITVIKQLQHP<br>LFQRYGSQIKYITPRKLLIVGGTSPSGLFDRTNSIISLDPLSETLTSIPISRRIW<br>EDHSLMLAGFSLVSTSMGTIHIIGGGATCYGFGSVTNVGLKLIAlAK |
| Q63KM8 | MSNQSIGAPDSTAVRVALWRALHARIDAPPHVLDDEIGLALAAPDDDWR<br>SRPDMDPQASRGYRASIVGRARFVEDLVDEQADRGAQYVVLGAGLDTF<br>AQRRAKLASHLRVFEIDQPGTQAWKRQRLIALGYGVPQWLRLVPVDFET<br>SGAWRAQLSAAGFDDSRPAVVSSTGVSMYLTREAIAGTLSQIATLAPGST<br>LAMTFLLPLELIDDAERAQHAAVYERARAAGTPFVSFFSPSMLALARE<br>AGFREARHVSTDDLVRRYFESRPDGLRPASGEAFLVAST                                                                                                                                                                                                                                                                                                                                                                                                                                                       |
| 1RJE   | MERIIQQTDYDALSCKLAAISVGYLPSSGLQRLSVDLSKKYTEWHRSYLIT<br>LKKFSRRAFGKVDKAMRSSFPVMNYGTYLRTVGDAAILEFLVANEKVQ<br>VVNLGCGSDLRMLPLLQMFPHLAYVDIDYNESVELKNSILRESEILRISLGL<br>SKEDTAKSPFLIDQGRYKLAACDLNDITETTRLLDVCTKREIPTIVISECLLC<br>YMHNNESQLLINTIMSKFSGHLWISYDPIGGSQPNDRFGAIMQSNLKESRN<br>LEMPTLMTYNSKEKYASRWSAAPNVIVNDMWEIFNAQIPESERKRLRSLQ<br>FLDELEELKVMQTHYILMKAQWHHHHHH                                                                                                                                                                                                                                                                                                                                                                                                 |
| 3IEI   | MATRQRESSITSCCSTSSMDENDEGVRGTCEDASLCKRFAVSIQYWHDPYI<br>QHFVRLSKERKAPEINRGYFARVHGVSQLIKAFLRKTECHCQIVNLGAGM<br>DTTFWRLKDEDLSSKYFEVDFPMIVTRKLSIKCKPPLSSPILELHSEDTL<br>QMDGHILDSKRYAVIGADLRDLSELEEKLKKCNMNTQLPTLLIAEVLVY<br>MTPEQSANLLKWAANSFERAMFINYEQVNMGDRFGQIMENLRRRQCDL<br>AGVETCKSLESQKERLLSNGWETASAVDMMELYNRLPRAEVSRIESLEFL<br>DEMELLEQLMRHYCLCWATKGGNELGLKEITY                                                                                                                                                                                                                                                                                                                                                                                                    |

---

**Table S3.** Primers used in this study. Small letters indicate the homologous sequences.

| Gene ID         | Primer number | Primer type | Primer sequence                                           | Relevant characteristics |
|-----------------|---------------|-------------|-----------------------------------------------------------|--------------------------|
| <i>pks10</i>    | P1            | UP-F        | GCAACACTGGCTTTTGACGA                                      | mutant                   |
| <i>(Fgfus1)</i> | P2            | UP-R        | TAGCCACGATTCTGAAGCCGCGGGAAAGATTGA<br>CTCGACAT             | contstruction            |
|                 | P3            | DOWN<br>-F  | GAAATGATAGCATTGAAGGATGAGACTAATCC<br>ATTCGAACGGGTAGTTCATAG |                          |
|                 | P4            | DOWN<br>-R  | TTGCAACAGAAAGAACAGGA                                      |                          |
|                 | P5            | KO-1F       | AGTGTGGACTATCTTCAACATCTTC                                 |                          |
|                 | P6            | KO-1R       | GGGAGGCTGAAGTGGACAAG                                      |                          |
|                 | P7            | KO-2F       | CTATGCGCGAGGAGAGGGTGTAGCA                                 |                          |
|                 | P8            | KO-2R       | TAACTACATCCTCAACTATGGCACT                                 |                          |
|                 | <i>Fgfus9</i> | P9          | UP-F                                                      | GAAGCTGGTTGAAGAAGTTG     |
| P10             |               | UP-R        | TAGCCACGATTCTGAAGCCGCTCATCGCTTCGTG<br>CTGTAGT             | contstruction            |
| P11             |               | DOWN<br>-F  | GAAATGATAGCATTGAAGGATGAGACTAATCC<br>AAGTTGGCGGTGTTTTAGTGA |                          |
| P12             |               | DOWN<br>-R  | TTTGAAACCAGTGTCGGGA                                       |                          |
| P13             |               | KO-1F       | CACTACAGCACGAAGCGATG                                      |                          |
| P14             |               | KO-1R       | GACGTCATAAAACACCGCC                                       |                          |
| P15             |               | KO-2F       | CCTGAAAGCAACTCCTTCCCG                                     |                          |
| P16             |               | KO-2R       | GCGTCGACAGGTCCACTGTAG                                     |                          |
| <i>hph</i>      | P17           | HY-F        | GCGGCTTCGAATCGTGGCTA                                      | mutant                   |
|                 | P18           | HY-R        | GTATTGACCGATTCTTGCAGTCCGAA                                | contstruction            |
|                 | P19           | YG-F        | GATGTAGGAGGGCGTGGATATGTCCT                                |                          |
|                 | P20           | YG-R        | TCATACTTCTCTTTTCAATTCAATGCG                               |                          |
| <i>neo</i>      | P21           | GE-F        | GCGGCTTCGAATCGTGGCTA                                      |                          |
|                 | P22           | GE-R        | CACGACGAGATCCTCGCCGTCG                                    |                          |
|                 | P23           | NT-F        | TGCTCGACGTTGTCACTGAAGCGG                                  |                          |
|                 | P24           | NT-R        | TGGATTAGTCTCATCCTTCAATGCTATCATTTT                         |                          |
| w162            | P25           | F           | GCCACGATTCTGAAGCCGCGAAGCTTAGAAGCT<br>GGTTGAAGAAGTT        | plasmid<br>construction  |
|                 | P26           | R           | CAGCTATGACCATGATTACGAATTCTGTTGGTT<br>TGTTTGTGAAAG         |                          |

**Table S4** Strains, plasmids, and primers used in protein express assay.

| Strains/Plasmids        | Description                                                                                                    | Source /Reference     |
|-------------------------|----------------------------------------------------------------------------------------------------------------|-----------------------|
| <b>Strains</b>          |                                                                                                                |                       |
| <i>Escherichia coli</i> |                                                                                                                |                       |
| DH5α                    | Host for general cloning                                                                                       | Transgen <sup>3</sup> |
| BL21(DE3)               | Host for protein expression                                                                                    | Novagen               |
| <b>Plasmids</b>         |                                                                                                                |                       |
| pET-28a(+)              | Protein expression vector used in <i>E. coli</i> , encoding <i>N</i> -terminal 6xHis-tag, kanamycin resistance | Novagen               |
| pGro7                   | <i>E. coli</i> vector; chaperone expression plasmid                                                            | Novagen               |
| <b>primer</b>           | <b>Sequence (The sequences of restriction enzymes are underlined)</b>                                          | <b>Enzyme sites</b>   |
| <i>Fgfus9</i> -For      | <u>tgccgcg</u> cgccgagccatgatcaaggccctacctct                                                                   | NedI                  |
| <i>Fgfus9</i> -Rev      | tggtggtggtggtgctcgagctaaacctacccaatgaa                                                                         | XhoI                  |

## 1.9 Bioassays for antibacterial activities and cytotoxic

To explore whether fusarins exhibit anti-infective activity, fusarin A (**1**) and neofusarin (**2**) were evaluated for their activities against a panel of oral bacterial pathogens, including Gram-positive cariogenic bacteria (*Streptococcus mutans*, *Lactobacillus acidophilus*, *Actinomyces viscosus*, *Enterococcus faecalis*) and Gram-negative periodontal bacteria (*Fusobacterium nucleatum*, *Porphyromonas gingivalis*). Consequently, none of them were found to be potent.

The double dilution method<sup>4</sup> was used to determine the minimum inhibitory concentration (MIC) of fusarin A (**1**) and neofusarin (**2**). Brain heart infusion broth (100  $\mu$ L) was added to each well in a 96-well plate and 100  $\mu$ L of sample was added into the first column of the plate. Stepwise double diluted sample from the first column to the penultimate column served as the experimental group, whereas the last column served as the blank control. 10  $\mu$ L of bacteria (concentration:  $\sim 3 \times 10^6$  CFU/mL) was added into each well of the plate. The gram-positive bacteria were incubated at 37  $^{\circ}$ C for 24 h and the gram-negative bacteria for 48 h in an anaerobic incubator. The MICs were recorded as the minimal concentration of the drug that cannot cause turbidity of the bacterial suspensions using a microplate reader (Winooski, VT 05404-0998) at 600 nm wavelength.

**Table S5** Anti-Oral-Bacteria Activity.

| Oral Bacteria Strains                      | Minimum Inhibitory Concentration (MIC) ( $\mu$ g/mL) |                         |
|--------------------------------------------|------------------------------------------------------|-------------------------|
|                                            | Fusarin A ( <b>1</b> )                               | Neofusarin ( <b>2</b> ) |
| <i>Streptococcus mutans</i> UA159          | >256                                                 | >256                    |
| <i>Lactobacillus acidophilus</i> ATCC 4356 | >256                                                 | >256                    |
| <i>Actinomyces viscosus</i> ATCC 19246     | 256                                                  | >256                    |
| <i>Enterococcus faecalis</i> ATCC 29212    | >256                                                 | >256                    |
| <i>Fusobacterium nucleatum</i> ATCC 25286  | >256                                                 | >256                    |
| <i>Porphyromonas gingivalis</i> ATCC 33277 | 128                                                  | >256                    |

In addition, PANC-1, A375, U87, and MHCC-97H human tumor cell lines were used in the cytotoxic assay. cells were seeded into each well of a 96-well cell culture plate. After 12 h of incubation at 37 $^{\circ}$ C, the test compound (0-100  $\mu$ M) was added. After incubating for 72 h, cells were subjected to the Cell Counting Kit-8 (CCK-8).<sup>5, 6</sup> The IC<sub>50</sub> value was calculated with Reed and Muench's method.

### 1.10 Extraction and purification of compounds 1-2.

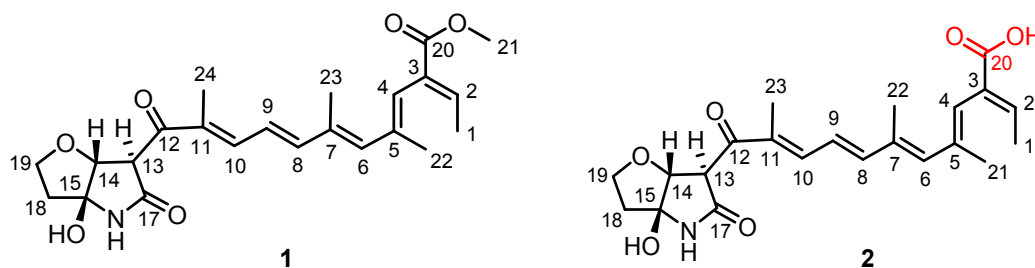

**Figure S3** Chemical structures of **1-2**.

A total of 10 L *F. graminearum* fermentation broth was subjected to compound isolation according to the method described. The culture medium was extracted with EtOAc, after each extraction the solvent was evaporated. The EtOAc extraction (20.0 g) was eluted by using the column chromatography on silica gel with a CH<sub>2</sub>Cl<sub>2</sub> /Me<sub>2</sub>CO gradient system (1:0, 9:1, 8:2, 7:3, 6:4) to A-E fractions. Among them, B fraction was chromatographed on a silica gel column with a petroleum ether/Me<sub>2</sub>CO gradient system (from 100:1 to 0:1) to afford fractions B1-B5. Fraction B4 was purified by semipreparative HPLC (3 mL/min, detector UV  $\lambda_{\max}$  = 330 nm, CNCH<sub>3</sub>/H<sub>2</sub>O 40:60) to yield **1** (3.0 mg, retention time = 38.2 min). Next, a total of 20 L  $\Delta Fgfs9$  strain was subjected to YEPD cultures, 7d, 25 °C, 180 r/min, and avoid lights. The fermentation broth was extracted with EtOAc, then the solvent was evaporated in vacuo. The extraction was also subjected to column chromatography on silica gel with a CH<sub>2</sub>Cl<sub>2</sub>/Me<sub>2</sub>CO gradient system (1:0, 9:1, 8:2, 7:3, 6:4) to A-E fractions. The C fraction was purified by repeats semipreparative HPLC (3 mL/min, detector UV  $\lambda_{\max}$  = 330 nm, CNCH<sub>3</sub>/H<sub>2</sub>O 40:60) to yield **2** (1.0 mg, retention time = 29.5 min).

Fusarin A (**1**), was obtained as a yellow gum. It had the molecular formula C<sub>23</sub>H<sub>29</sub>NO<sub>6</sub> as deduced by the sodium (+)-HRESIMS ion at  $m/z$  416.2068 [M + H]<sup>+</sup> (calcd 416.2068), indicating ten degrees of unsaturation. According to the literature reported,<sup>7</sup> compound **1** was determined as fusarin A.

Neofusarin (**2**), was obtained as a yellow gum. It had the molecular formula C<sub>22</sub>H<sub>27</sub>NO<sub>6</sub> as deduced by the sodium (+)-HRESIMS ion at  $m/z$  402.1915 [M + H]<sup>+</sup> (calcd 402.1911), indicating ten degrees of unsaturation. The <sup>1</sup>H NMR exhibited characteristic signals for six olefinic protons at  $\delta_{\text{H}}$  6.94 (m, H-2), 5.97 (s, H-4), 6.24 (s, H-6), 7.51 (d, 15.2, H-8), 6.78 (dd, 15.2, 11.1, H-9), and 7.47 (d, 11.1, H-10), four methyl groups at  $\delta_{\text{H}}$  1.80 (d, 7.5, H<sub>3</sub>-1), 1.70 (s, H<sub>3</sub>-21), 2.40 (s, H<sub>3</sub>-22), and 1.97 (s, H<sub>3</sub>-23). Its <sup>13</sup>C NMR spectra disclosed 22 carbon resonances, including obviously one carbonyl, two ester carbonyl, and four methyls. Elaborate analysis of the 2D NMR data of neofusarin suggested its structure to be highly similar to **1**, except that the C-20 ester group in **1** was replaced with a carboxyl in **2**. In other words, the C-21 methyl was disappeared. Thus, the structure of **2** was unambiguously determined. The neofusarin (**2**) is the first intermediate that possessing furan conjugated pyrrolidone ring in *N*-terminal and carboxyl at C-20.

## 2. Supplementary Figures

### 2.1 UV absorption of compounds 1-2.

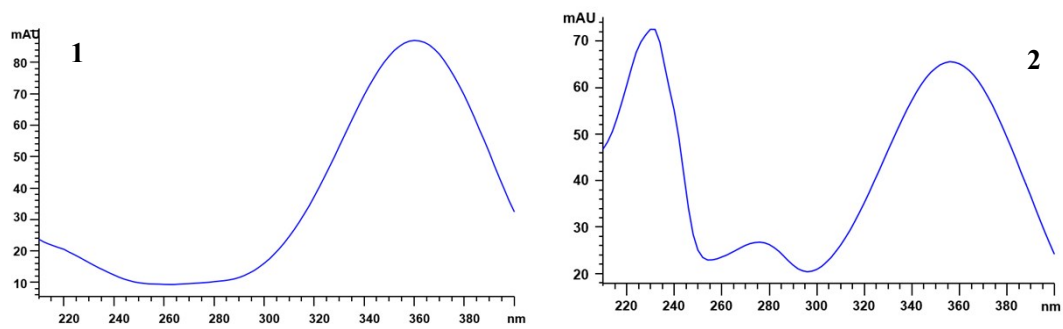

**Figure S4** The UV absorption of compounds **1-2**.

### 2.2 HRESIMS and NMR spectra of 1-2.



## Qualitative Analysis Report

|                        |              |               |                      |
|------------------------|--------------|---------------|----------------------|
| Data Filename          | FA.d         | Sample Name   | FA                   |
| Sample Type            | Sample       | Position      | Vial 25              |
| Instrument Name        | Instrument 1 | User Name     |                      |
| Acq Method             | yqDD-65.m    | Acquired Time | 2021/3/24 1:51:26 PM |
| IRM Calibration Status | Success      | DA Method     | Default.m            |

**Sample Group**  
**Acquisition SW**      6200 series TOF/6500 series  
**Version**                Q-TOF B.05.01 (B5125.3)

### User Spectra

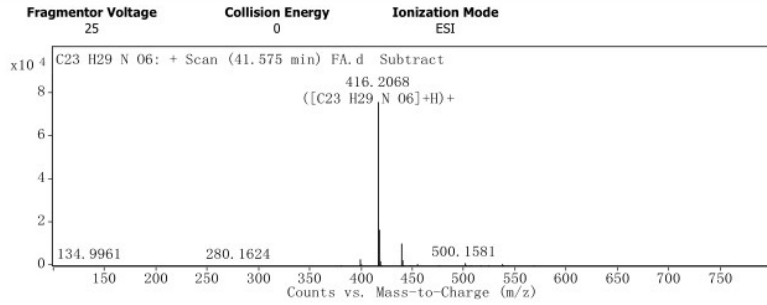

### Peak List

| m/z      | z | Abund    | Formula      | Ion     |
|----------|---|----------|--------------|---------|
| 416.2068 | 1 | 75852.67 | C23 H29 N O6 | (M+H)+  |
| 417.2098 | 1 | 16921.44 | C23 H29 N O6 | (M+H)+  |
| 418.2124 | 1 | 2464.99  | C23 H29 N O6 | (M+H)+  |
| 419.2157 | 1 | 287.76   | C23 H29 N O6 | (M+H)+  |
| 438.1884 | 1 | 10285.58 | C23 H29 N O6 | (M+Na)+ |
| 439.1927 | 1 | 2715.83  | C23 H29 N O6 | (M+Na)+ |
| 440.1944 | 1 | 551.44   | C23 H29 N O6 | (M+Na)+ |

### Formula Calculator Element Limits

| Element | Min | Max |
|---------|-----|-----|
| C       | 3   | 60  |
| H       | 0   | 120 |
| O       | 1   | 10  |
| N       | 1   | 5   |

### Formula Calculator Results

| Ion Formula      | m/z      | m/z (Calc) | DBE  | Diff (ppm) | Score (MFG) |
|------------------|----------|------------|------|------------|-------------|
| C23 H30 N O6     | 416.2068 | 416.2068   | 10   | -0.09      | 100         |
| Ion Formula      | m/z      | m/z (Calc) | DBE  | Diff (ppm) | Score (MFG) |
| C23 H29 N Na O6  | 438.1884 | 438.1887   | 10   | 0.74       | 99.76       |
| C21 H27 N4 Na O5 | 438.1884 | 438.1874   | 10.5 | -2.49      | 97.36       |

--- End Of Report ---

**Figure S5** HRESIMS analysis of fusarin A (**1**).

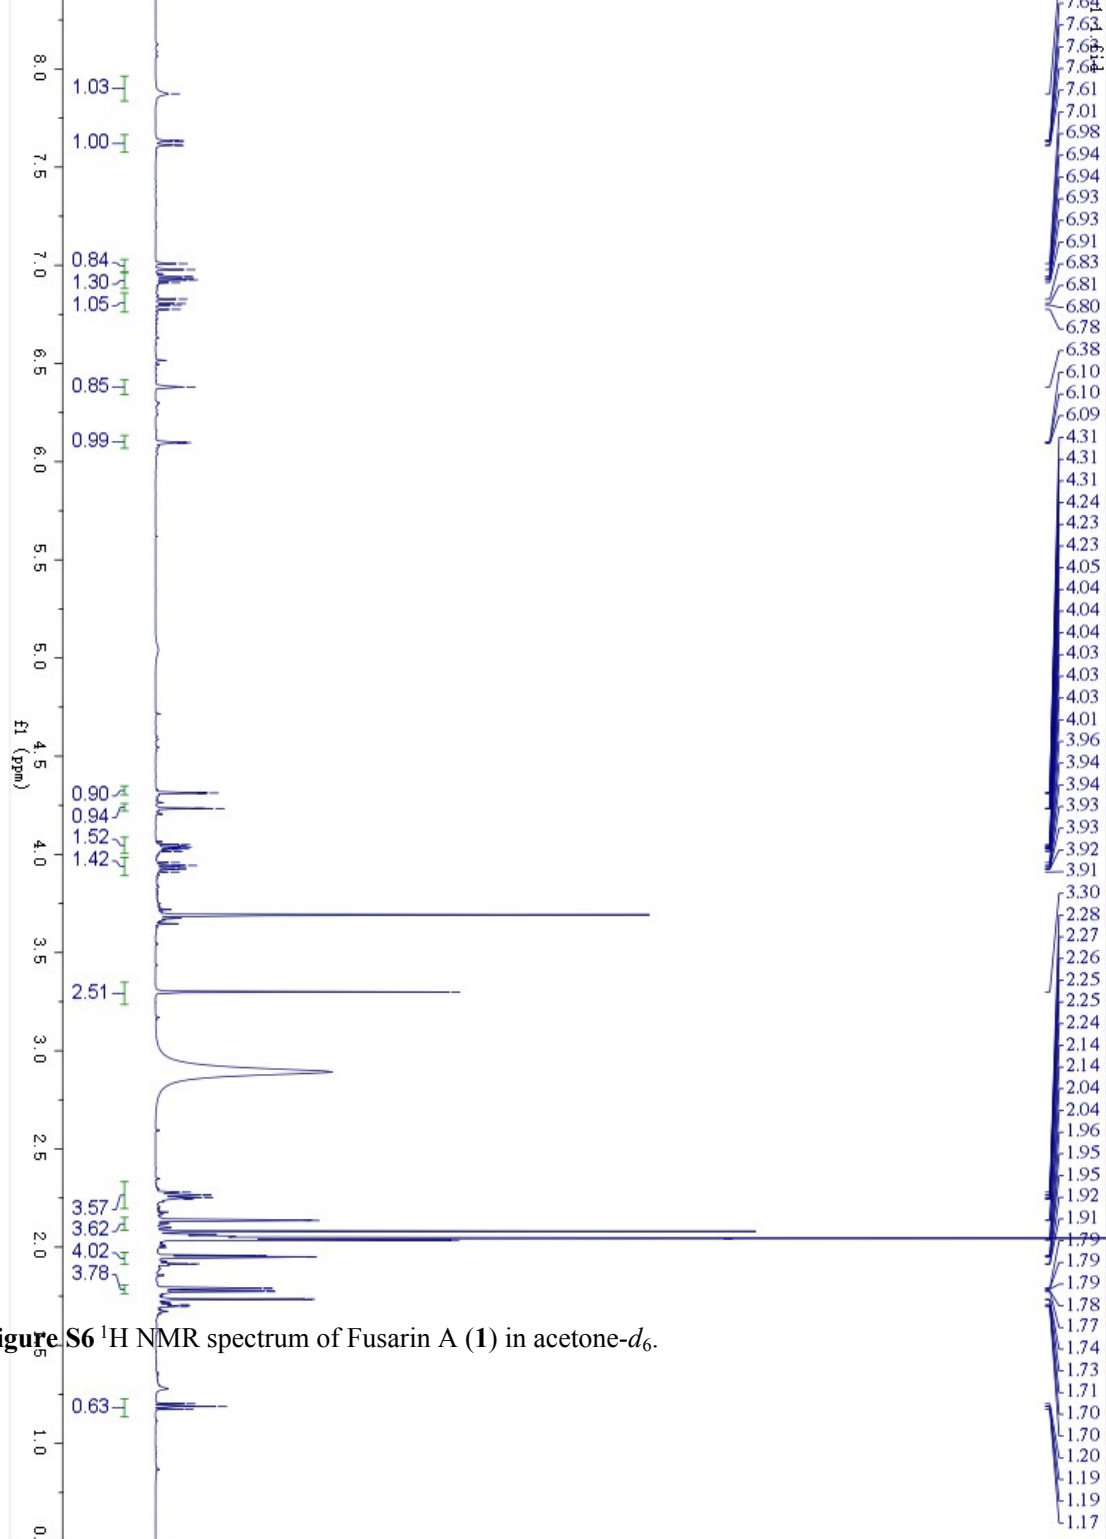

Figure S6  $^1\text{H}$  NMR spectrum of Fusarin A (1) in acetone- $d_6$ .

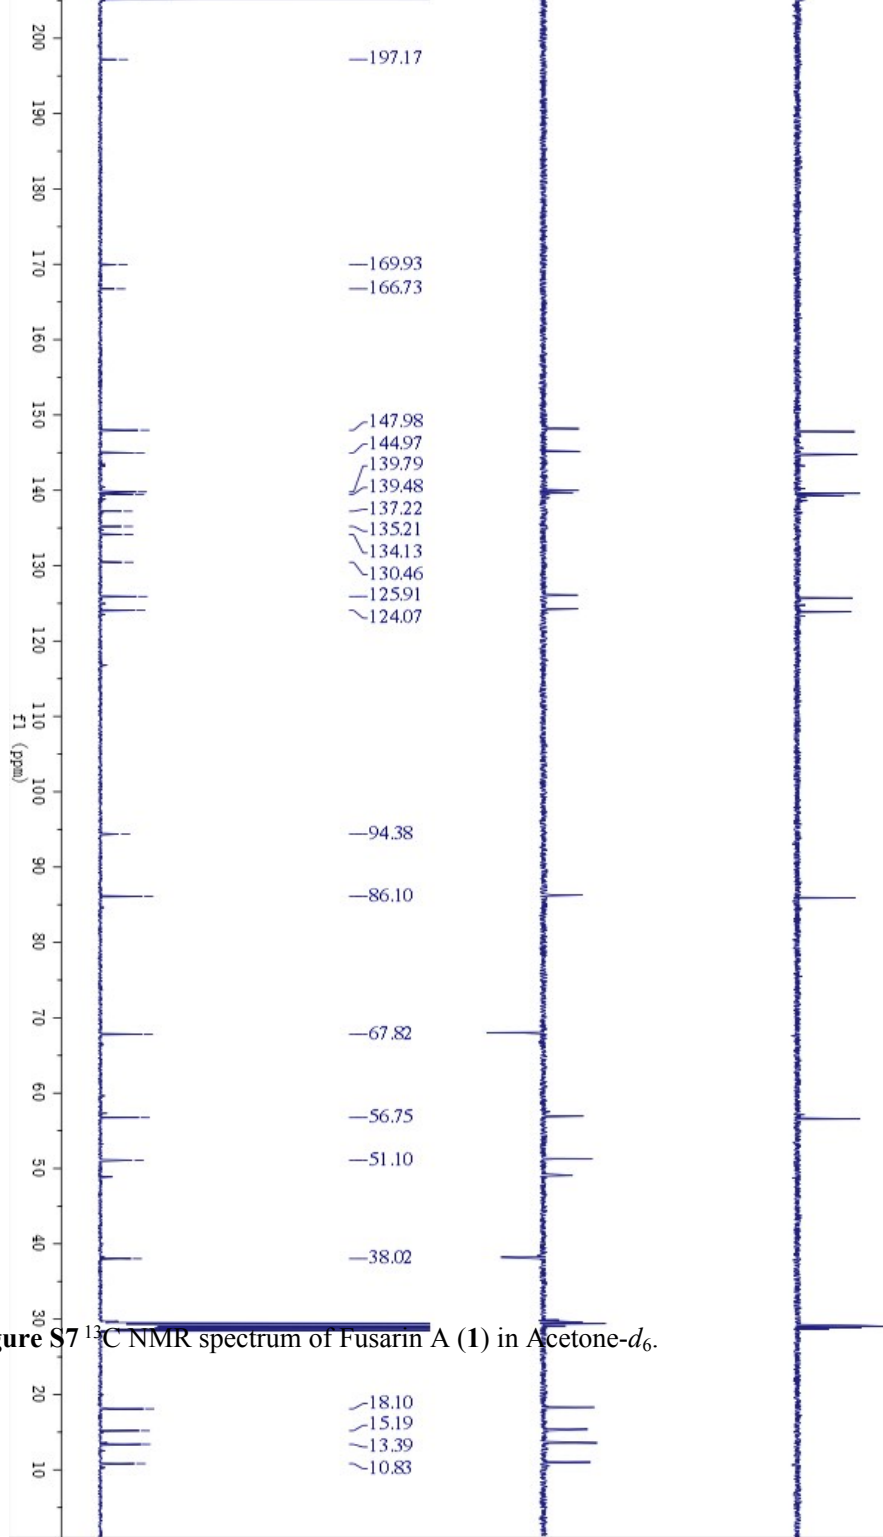

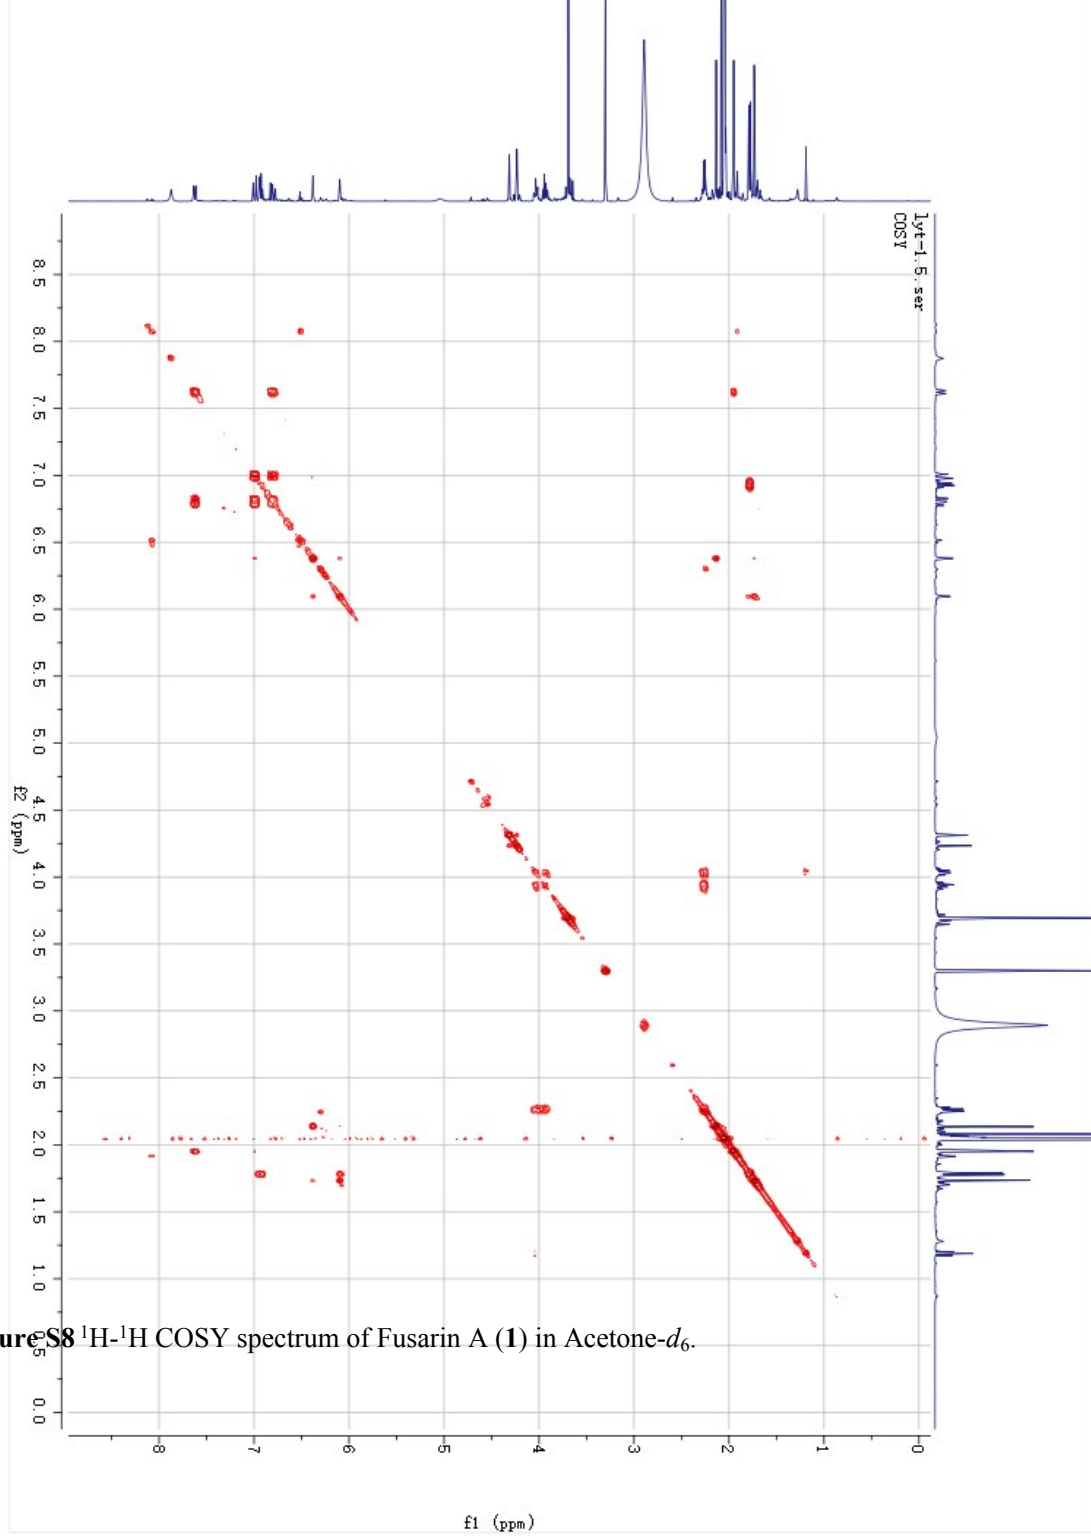

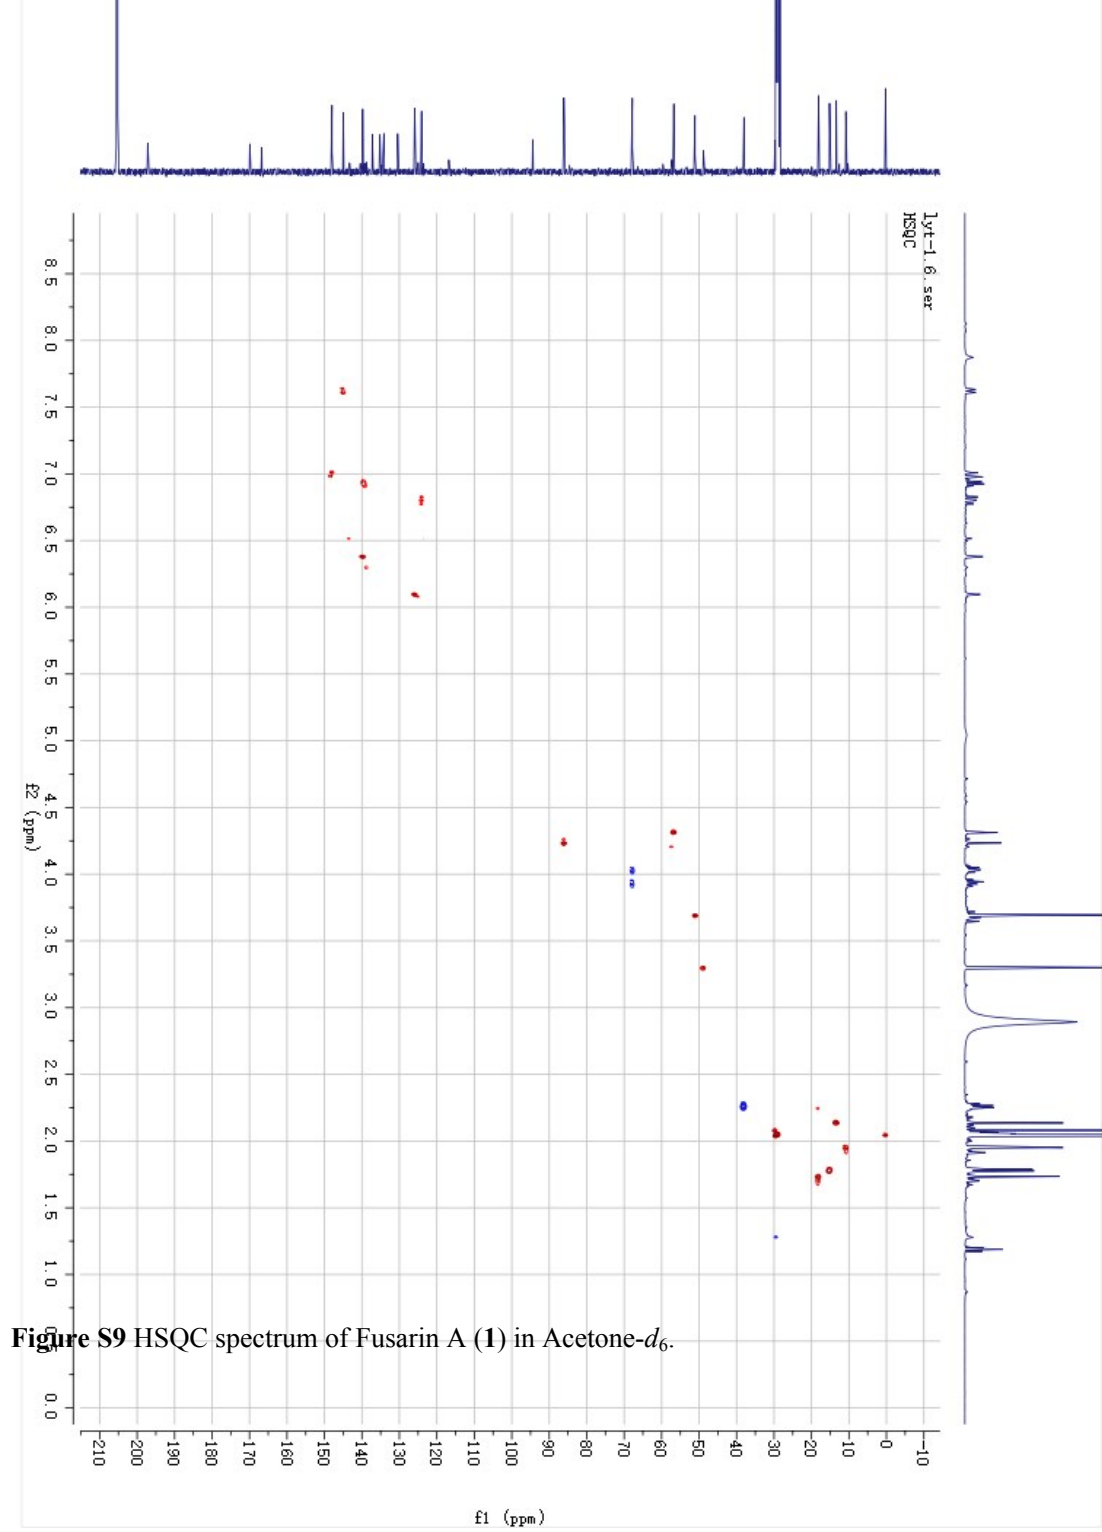

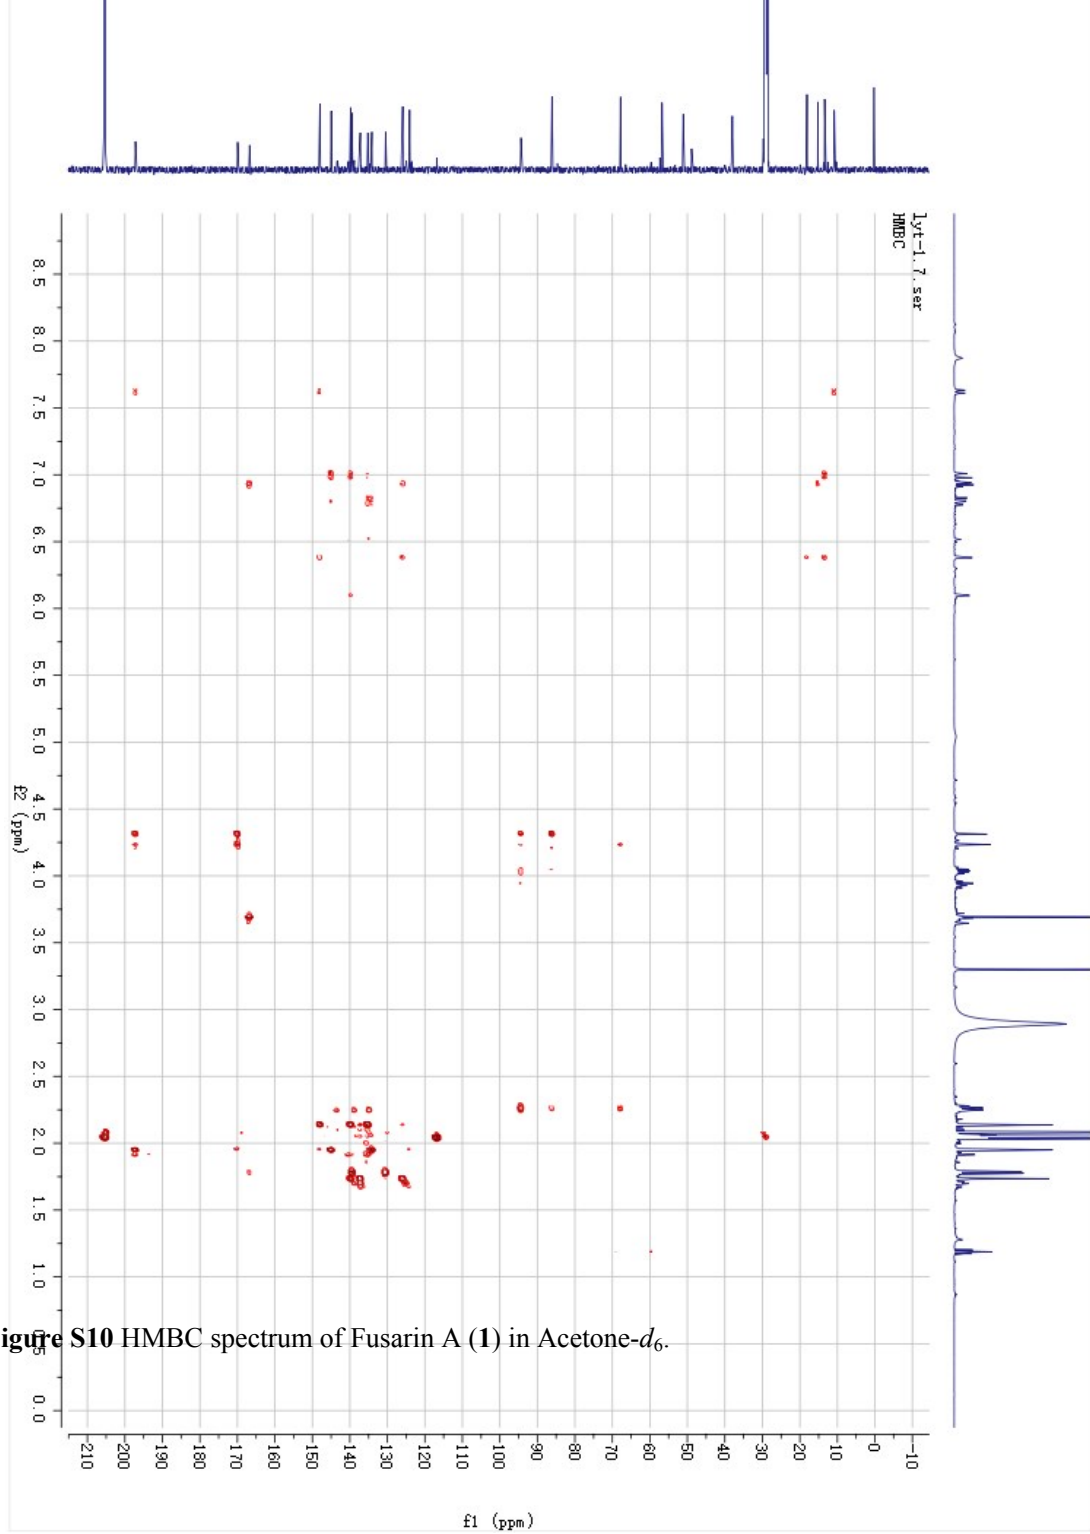

**Figure S10** HMBC spectrum of Fusarin A (1) in Acetone- $d_6$ .

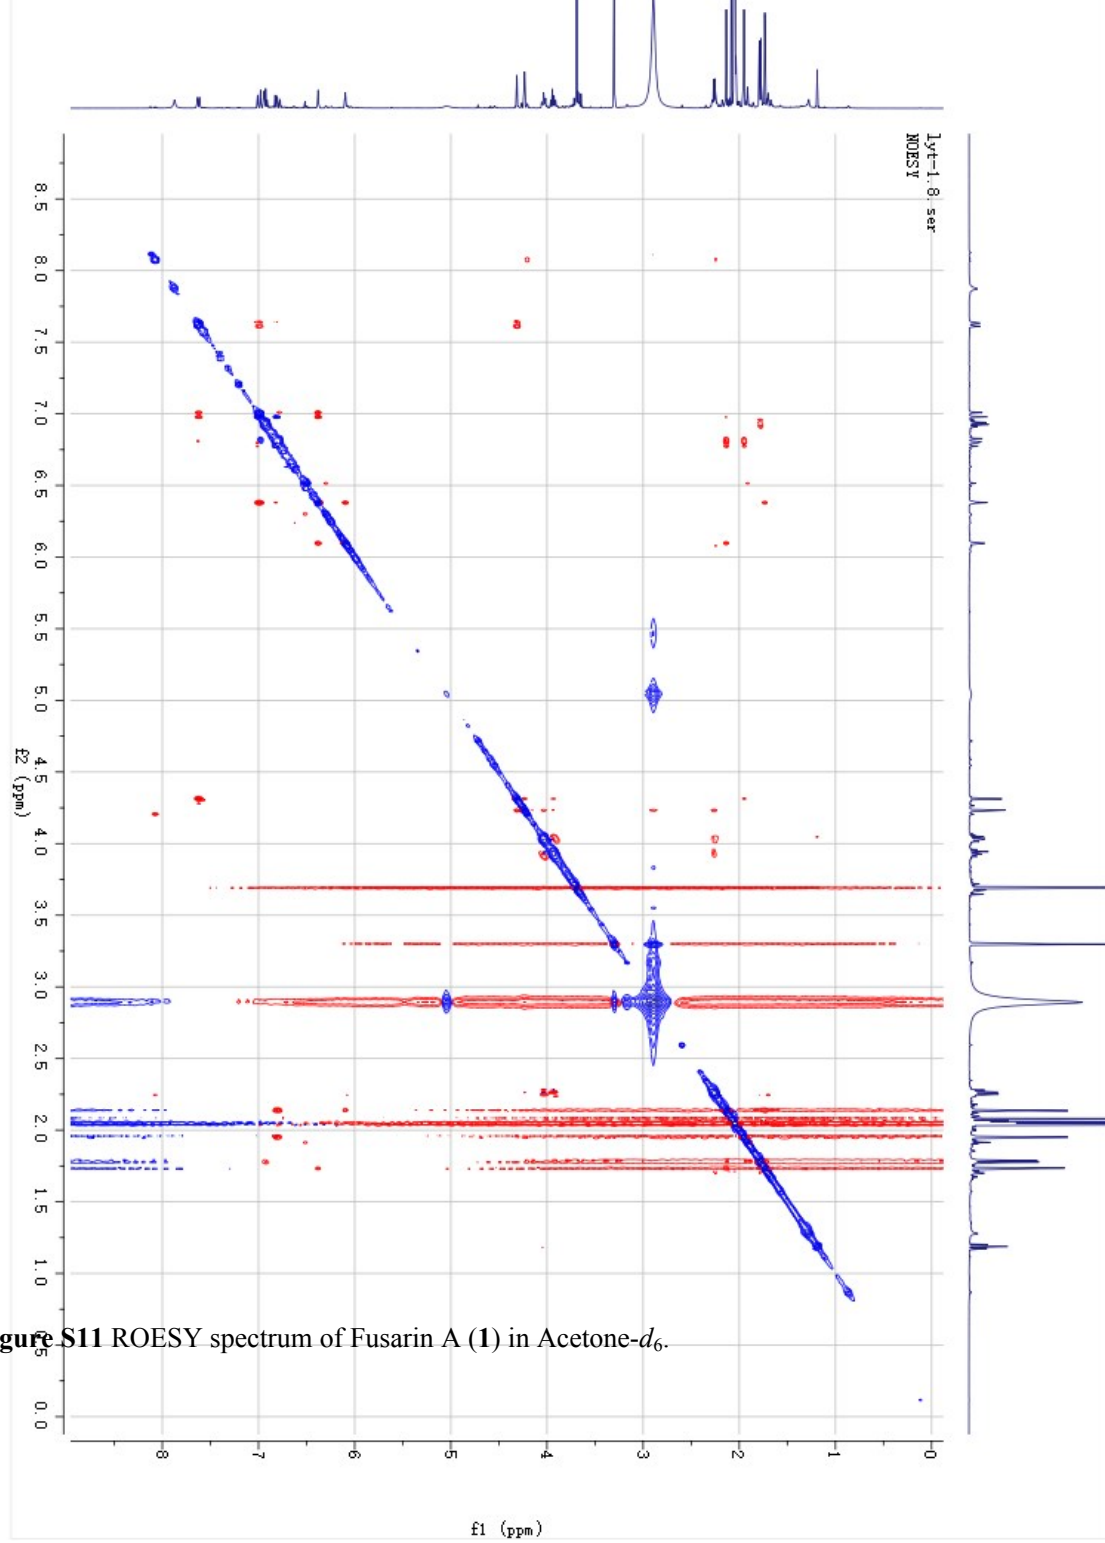

## Qualitative Analysis Report

|                        |              |               |                       |
|------------------------|--------------|---------------|-----------------------|
| Data Filename          | 20210129-1.d | Sample Name   | 20210129-1            |
| Sample Type            | Sample       | Position      | Vial 41               |
| Instrument Name        | Instrument 1 | User Name     | hp-PC\hp              |
| Acq Method             | yqtd_new.m   | Acquired Time | 1/29/2021 12:10:17 PM |
| IRM Calibration Status | Success      | DA Method     | Default.m             |

Comment

|                |                             |
|----------------|-----------------------------|
| Sample Group   | Info.                       |
| Acquisition SW | 6200 series TOF/6500 series |
| Version        | Q-TOF B.05.01 (B5125.3)     |

### User Spectra

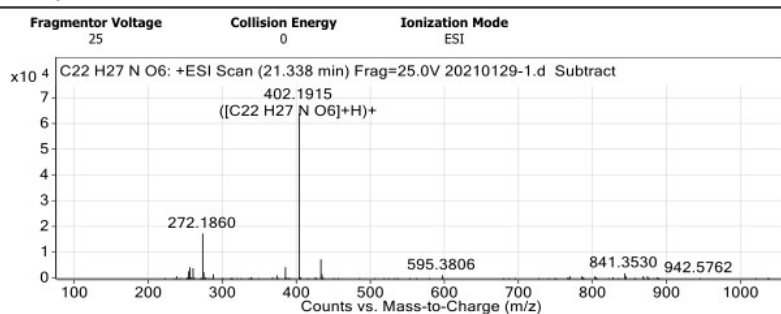

#### Peak List

| m/z      | z | Abund    | Formula      | Ion    |
|----------|---|----------|--------------|--------|
| 402.1915 | 1 | 64187.27 | C22 H27 N O6 | (M+H)+ |
| 403.1942 | 1 | 12703.12 | C22 H27 N O6 | (M+H)+ |

#### Formula Calculator Element Limits

| Element | Min | Max |
|---------|-----|-----|
| C       | 3   | 80  |
| H       | 3   | 120 |
| O       | 1   | 10  |
| N       | 1   | 5   |

#### Formula Calculator Results

| Ion Formula   | m/z      | m/z (Calc) | DBE | Diff (ppm) | Score (MFG) |
|---------------|----------|------------|-----|------------|-------------|
| C22 H28 N O6  | 402.1915 | 402.1911   | 10  | -0.96      | 99.61       |
| C23 H24 N5 O2 | 402.1915 | 402.1925   | 15  | 2.37       | 97.67       |

--- End Of Report ---

Figure S12 HRESIMS analysis of neofusarin (2).



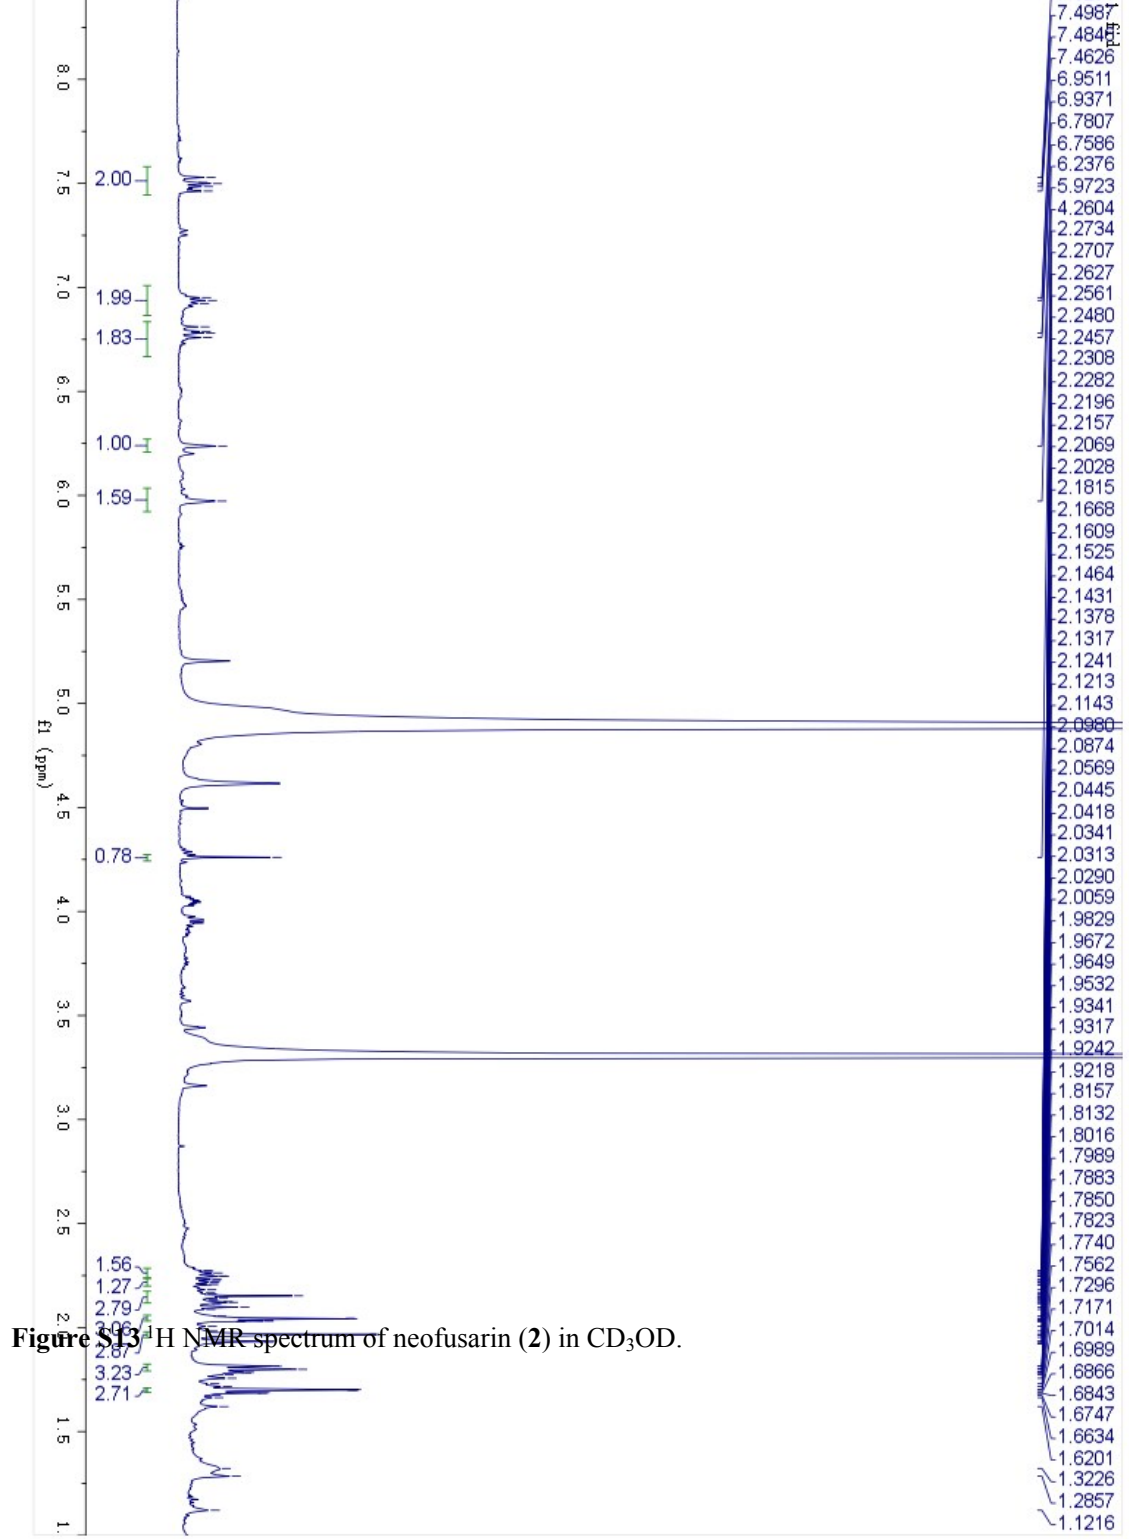

Figure S13  $^1\text{H}$  NMR spectrum of neofusarin (2) in  $\text{CD}_3\text{OD}$ .

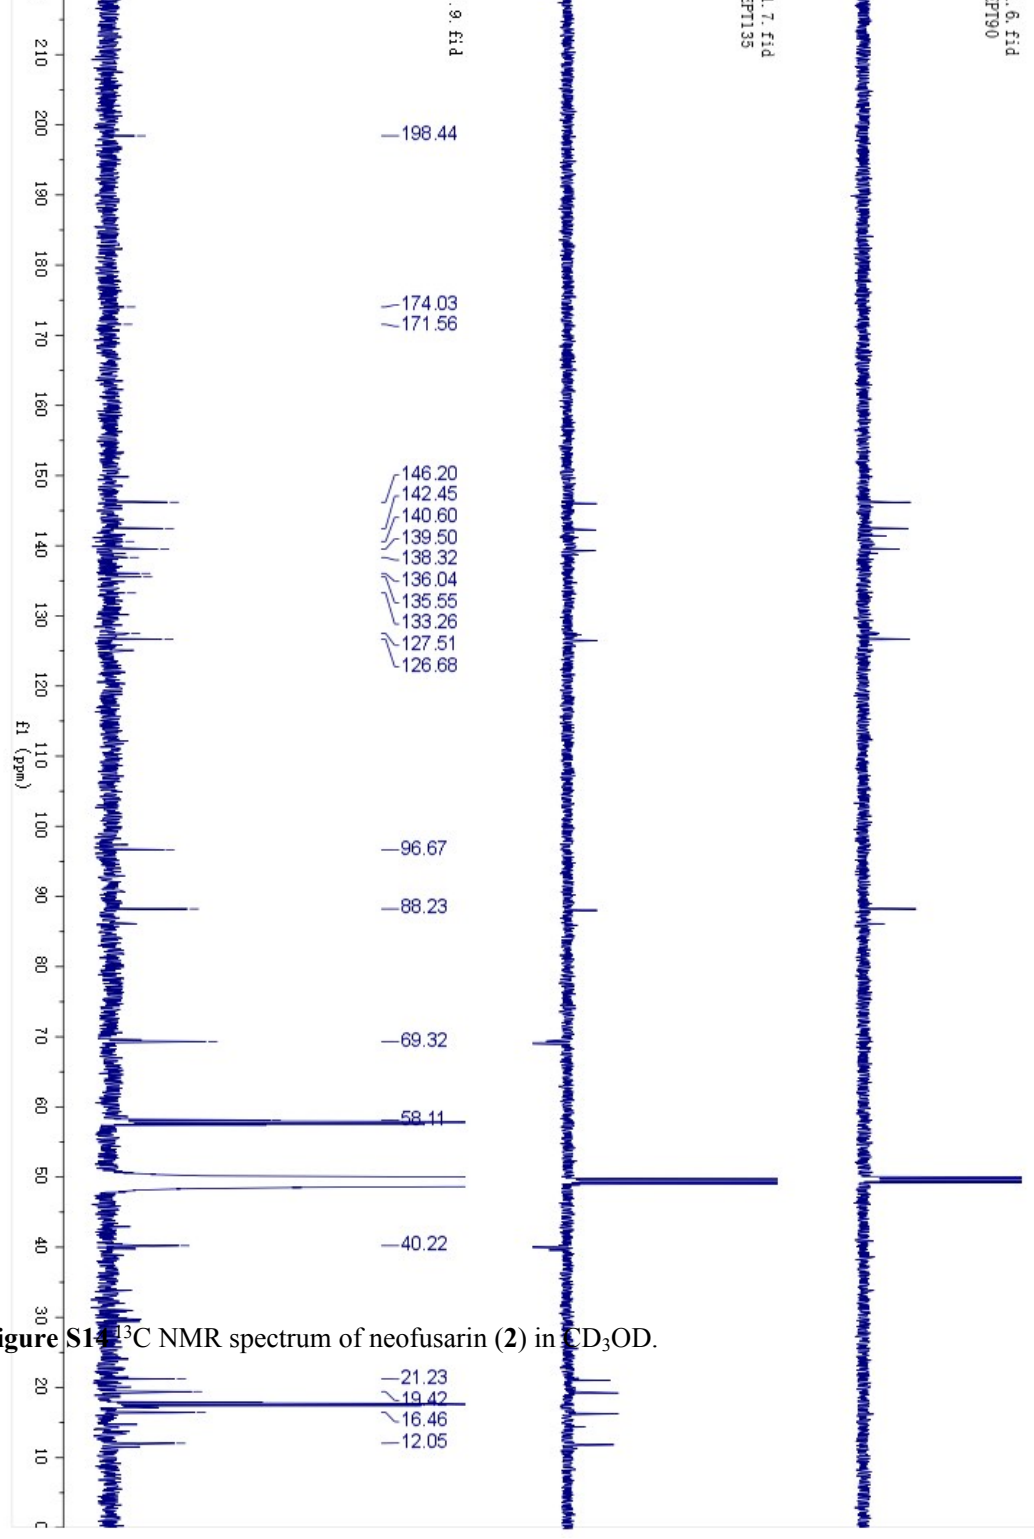

Figure S14 <sup>13</sup>C NMR spectrum of neofusarin (2) in CD<sub>3</sub>OD.

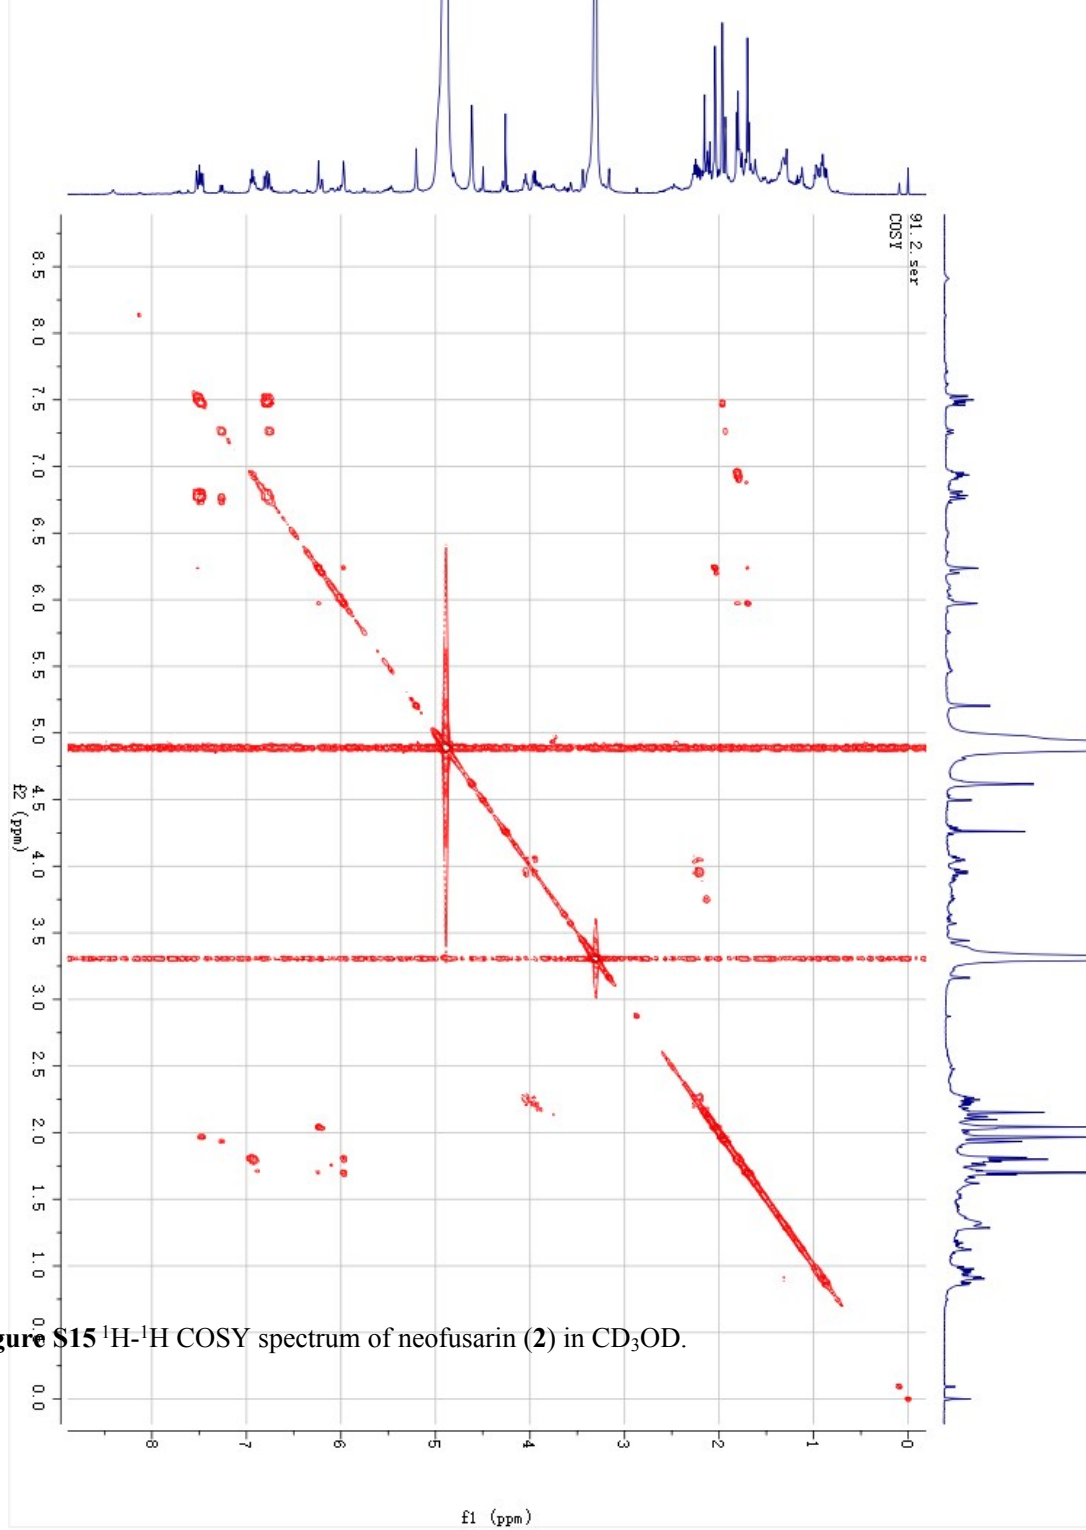

**Figure S15**  $^1\text{H}$ - $^1\text{H}$  COSY spectrum of neofusarin (**2**) in  $\text{CD}_3\text{OD}$ .

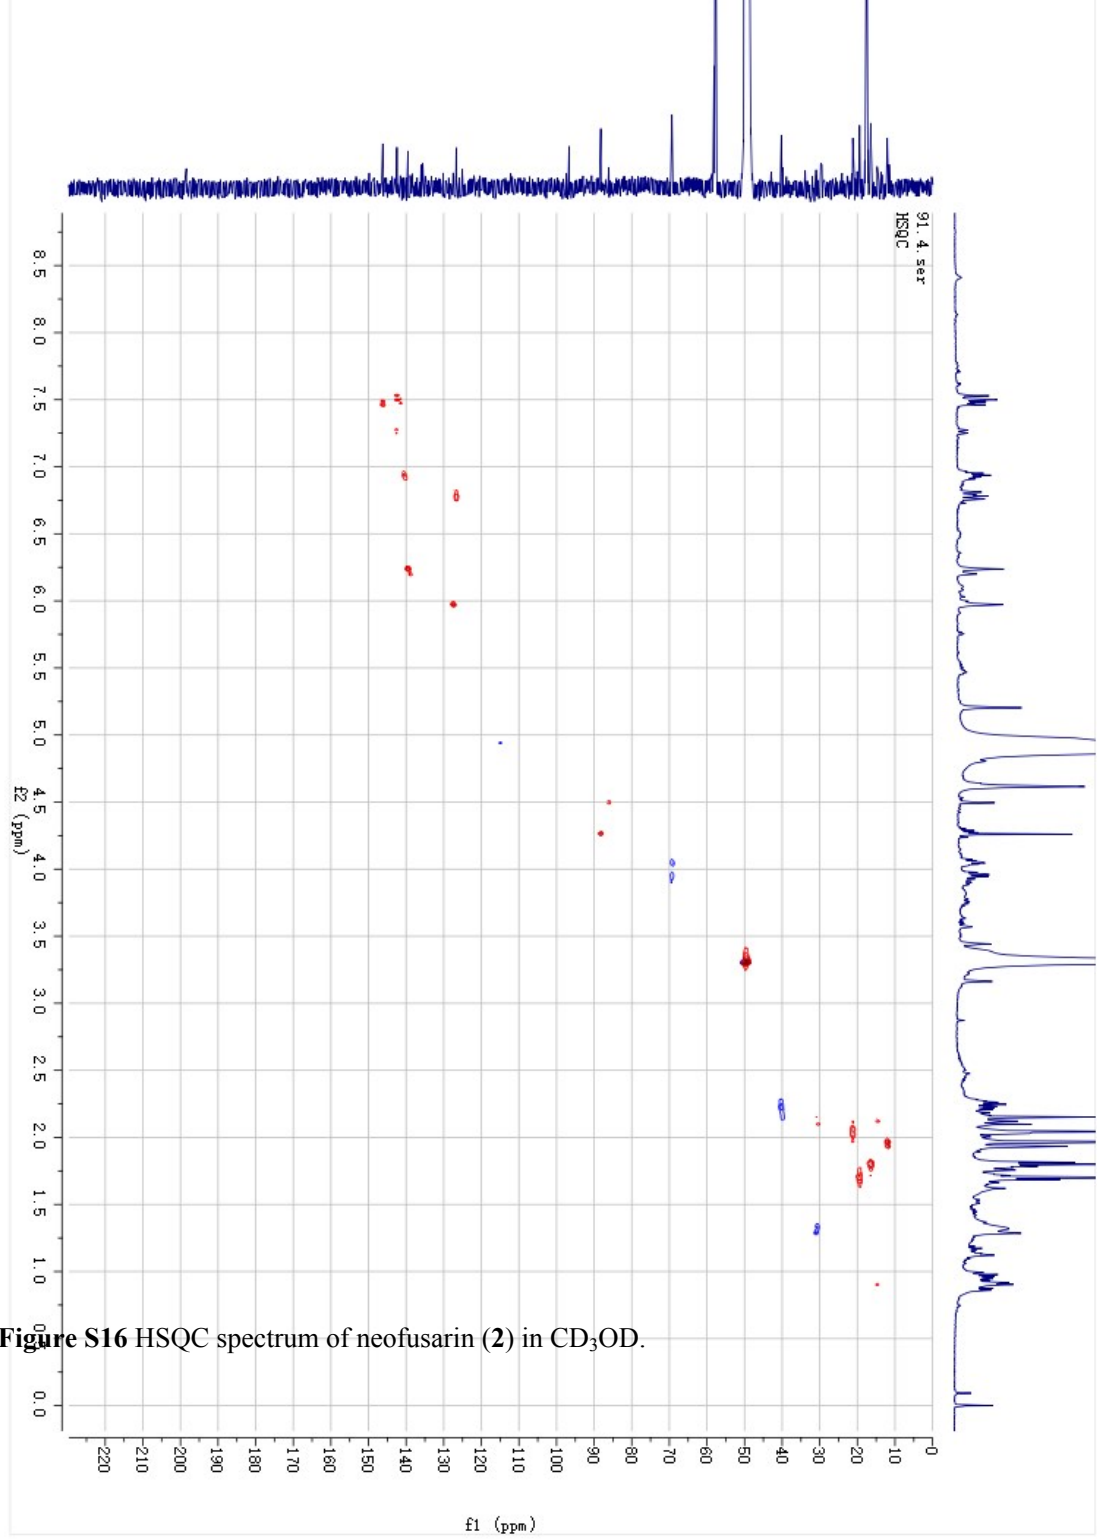

Figure S16 HSQC spectrum of neofusarin (2) in CD<sub>3</sub>OD.

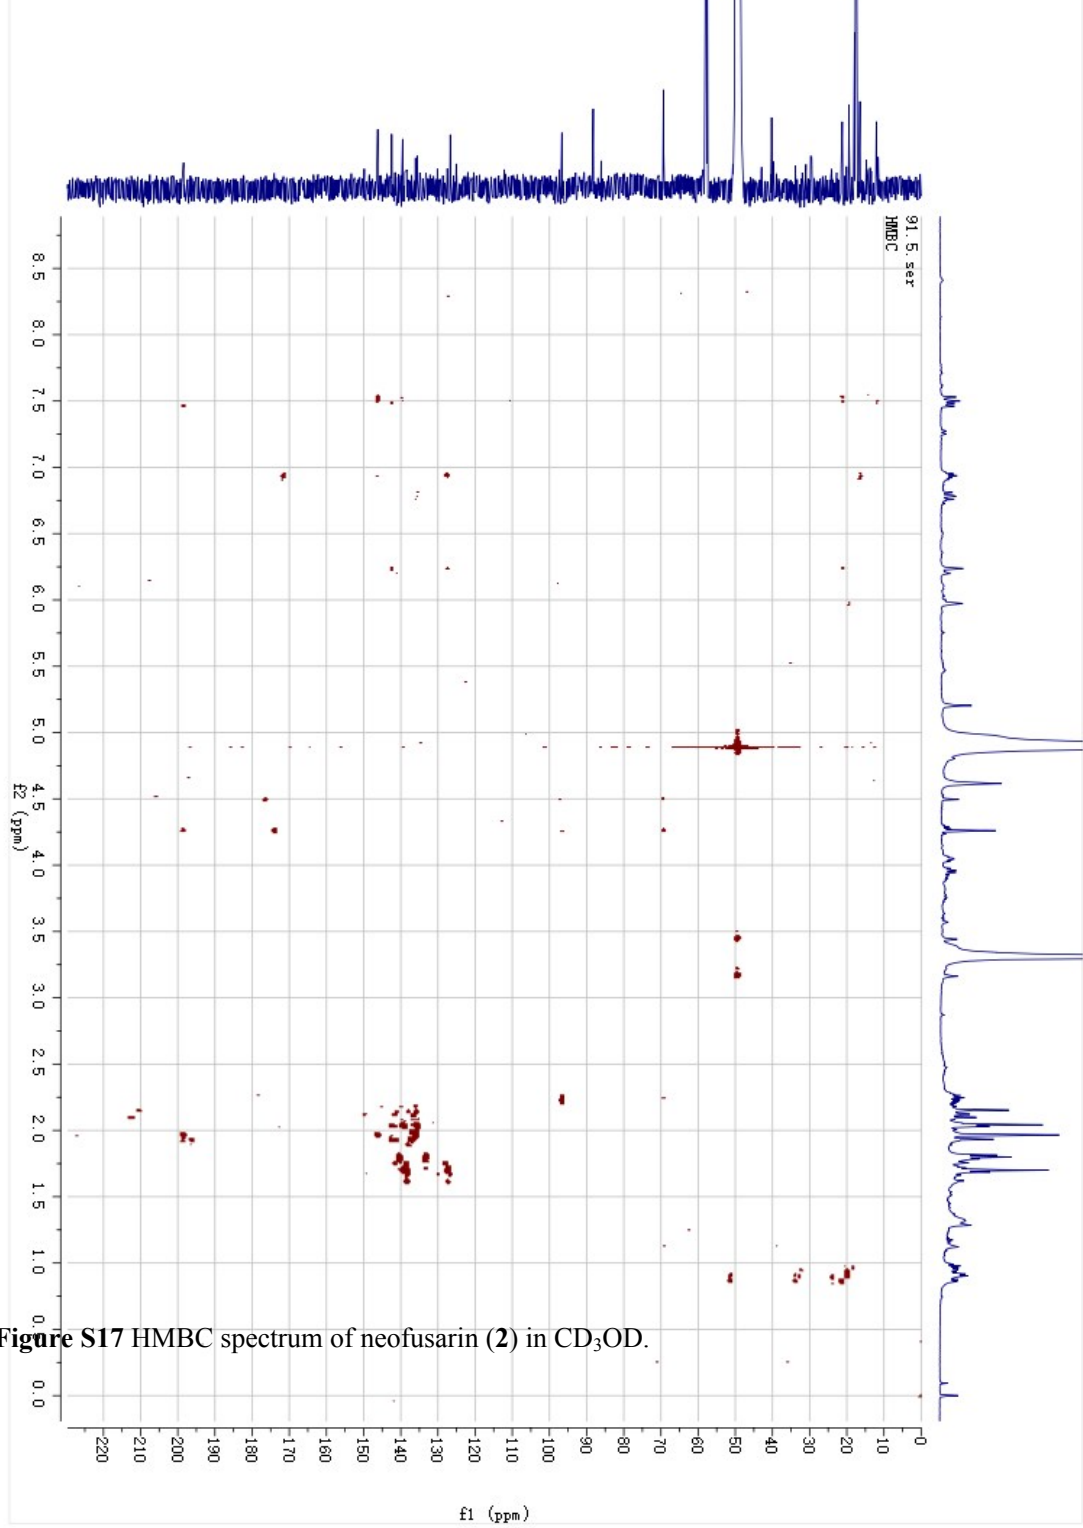

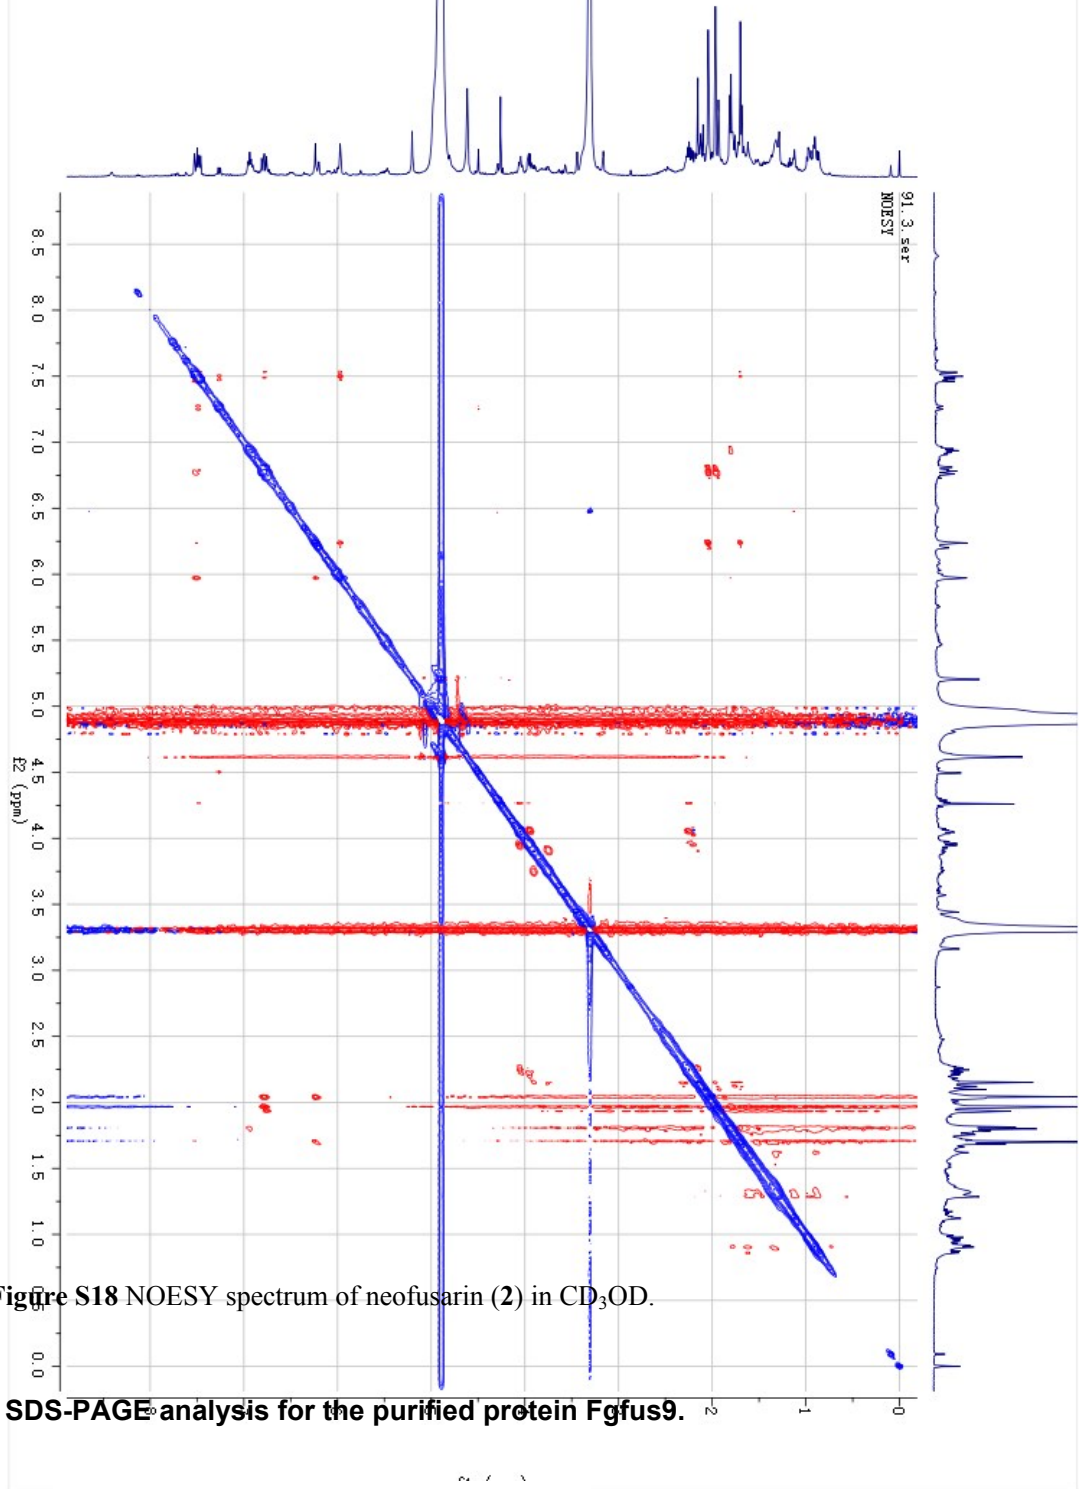

Figure S18 NOESY spectrum of neofusarin (2) in CD<sub>3</sub>OD.

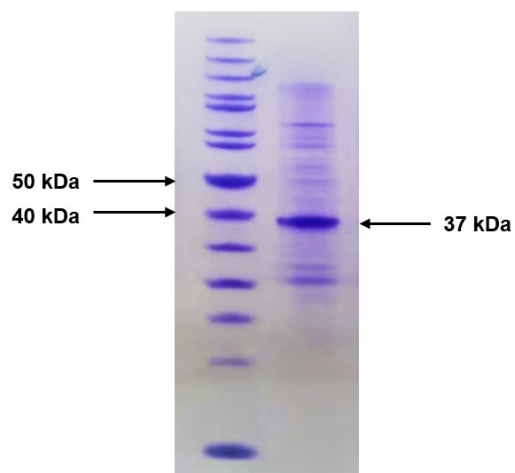

Figure S19 SDS-PAGE of purified recombinant Fg fus9. Lane 1: protein marker, Lane 2: protein

### 3 Supplementary references

1. R. S. Goswami, Targeted gene replacement in fungi using a split-marker approach, *Methods in molecular biology (Clifton, N.J.)*, 2012, **835**, 255-269.
2. S. Kumar, G. Stecher and K. Tamura, MEGA7: Molecular Evolutionary Genetics Analysis Version 7.0 for Bigger Datasets, *Molecular biology and evolution*, 2016, **33**, 1870-1874.
3. G. M. R. S. J, *Molecular Cloning: A Laboratory Manual 4th ed.* , Cold Spring Harbor Laboratory Press, 2012.
4. X. Zhao, Y. Jia, J. Li, R. Dong, J. Zhang, C. Ma, H. Wang, Y. Rui and X. Jiang, Indole Derivative-Capped Gold Nanoparticles as an Effective Bactericide in Vivo, *ACS Applied Materials & Interfaces*, 2018, **10**, 29398-29406.
5. M. Ishiyama, Y. Miyazono, K. Sasamoto, Y. Ohkura and K. Ueno, A highly water-soluble disulfonated tetrazolium salt as a chromogenic indicator for NADH as well as cell viability, *Talanta*, 1997, **44**, 1299-1305.
6. H. Tominaga, M. Ishiyama, F. Ohseto, K. Sasamoto, T. Hamamoto, K. Suzuki and M. Watanabe, A water-soluble tetrazolium salt useful for colorimetric cell viability assay, *Analytical Communications*, 1999, **36**, 47-50.
7. L. A. Wiebe and L. F. Bjeldanes, Fusarin C, A Mutagen from *Fusarium Moniliforme* Grown on Corn, *Journal of Food Science*, 1981, **46**, 1424-1426.
